# Supplementary material for: An Integrative Transcriptomics and Proteomics Approach to Identify Putative Genes Underlying Fruit Ripening in Tomato near Isogenic Lines with Long Shelf Life
Source: Plants (Basel). 2023 Jul 29;12(15):2812. doi: 10.3390/plants12152812 (PMC10421356; doi:10.3390/plants12152812)
Supplement: Supplementary file 1 [file plants-12-02812-s001.zip › SupplementaryMaterial_2.xlsx]

## Sheet: TableS1
Table S1. Quality traits. Mean values and standard errors for NIL115, NIL080 and their parental genotypes.
Trait	Parental genotypes		NILs
	CAI	LA0722	NIL115	NIL080
D	7.27 ± 0.18	1.24 ± 0.03*	3.96 ± 0.37*	5.89 ± 0.27*
H	5.18 ± 0.20	1.14 ± 0.03*	3.32 ± 0.27*	4.26 ± 0.14*
Sh	0.72 ± 0.01	0.93 ± 0.01*	0.85 ± 0.03*	0.74 ± 0.01
W	76.89 ± 7.47	0.74 ± 0.04*	31.64 ± 8.76	96.21 ± 10.54
LN	8.87 ± 0.44	2.06 ± 0.03*	3.34 ± 0.67*	7.25 ± 0.58
PT	0.41 ± 0.04	0.075 ± 0.01*	0.67 ± 0.09	0.47 ± 0.02
SL	4.50 ± 1.61	15.19 ± 3.07*	14.00 ± 1.38*	10.60 ± 1.97
F	42.12 ± 2.85	57.33 ± 1.53*	90.97 ± 6.14*	97.90 ± 2.24*
a/b	0.88 ± 0.02	1.08 ± 0.11	0.42 ± 0.62	-0.27 ± 0.02*
L	55.98 ± 8.83	39.49 ± 0.98*	45.07 ± 14.11	58.02 ± 0.90
SSC	5.78 ± 0.44	9.10 ± 0.65*	6.67 ± 0.37	4.87 ± 0.13
pH	4.41 ± 0.12	4.46 ± 0.07	4.77 ± 0.20	4.29 ± 0.11
TA	0.52 ± 0.08	0.96 ± 0.14*	0.30 ± 0.00	0.45 ± 0.04
D: diameter (cm); H: height (cm); Sh: shape (H/D); W: weight (g); LN: locule number; PT: pericarp thickness (cm); SL: shelf life (days); F: firmness; a/b and L: CIELAB color indexes; SSC: soluble solids content (°Brix); TA: titratable acidity (g citric and malic acid/100 g of homogenized juice). Asterisks show significant differences with CAI (Dunnett test, p-value < 0.05).

## Sheet: TableS2
Table S2. Markers used for the molecular characterization.
Chr	Marker ID	Physical position (SL4.0)	Primer sequence (5'-3')
1	IND1-0149	SL4.0ch01:1,504,228	F: TTGTTTCTAAGTTTTGATTCATCACC
			R: GGTCTACTCCTTTTTCAAAACTCG
	IND1-0317	SL4.0ch01:3,117,684	F: TGTAACTTTTCCCCTCTCACG
			R: AACACAGCACAGAACCAACG
	IND1-0512	SL4.0ch01:5,152,650	F: GAAAATCTACTTGTAAAGCACACTCG
			R: AAACTCGCGTTTAAAATGGTG
	SSR095	SL4.0ch01:70,499,385	F: CAATCCAACAAGCAATCCCT
			R: CCACATAACTAAGCCCACAACTT
	IND1-8018	SL4.0ch01:72,757,986	F: AAACAAGGGGTGGAACTGTG
			R: TATTCAGCATCTGGGCATGT
	SSR220060	SL4.0ch01:73,954,467	F: CCAGTTGCTTTCCCAGATGT
			R: CCTTCTGACAGAGATTGCGT
	IND1-9461	SL4.0ch01:86,926,002	F: CATGACCTCGTAACTGCCTTC
			R: ACAGATTTGGGACCAGTGATCT
	SSR288	SL4.0ch01:89,276,091	F: TCGTGGGAATTTGTTAACCC
			R: TCTTCATCGTCCTCCTCCTG
2	IND2-2019	SL4.0ch02:18,591,294	F: CAGGGAGGCTTCTCAACATAA
			R: GCATGGATGTCTCCCATCTT
	SSR295	SL4.0ch02:35,928,914	F: CTCCAGAAGGAACTCGATGC
			R: CAATTCCTTTCACCTGCCAC
	IND2-3976	SL4.0ch02:37,775,679	F: GGCCTGAATTCTTTCCATTTT
			R: TCATCAACTTTTAGTGGCGTTC
	IND2-4384	SL4.0ch02:41,822,790	F: TGTTACAATTCACCCCACTGC
			R: TGATTTTCATAACAAGTAATGCTGCT
	SSR598	SL4.0ch02:43,849,175	F: TGGAAAGAAGCAGTAGCATTG
			R: CAACGAACATCCTCCGTTCT
	IND2-4465	SL4.0ch02:48,109,769	F: TGGTGAATTGTAATAACTTGTCTTG
			R: CAGCTTGGCTAAGCATACTTTTT
	LC	SL4.0ch02:45,189,395	F: GCCGAACACATCAACATTTC
			R: CCTTTTCCTAAAAGATTTGGCATGAAG
	FW2.2	SL4.0ch02:50,292,139	F: CATATAAAGTGTACTGACCGTCA
			R: CTGTCCTATTCAAGAGGTAAATGAG
3	IND3-0117	SL4.0ch03:1,215,918	F: GGGGAAGCAAAGTGTCTTCA
			R: GCCATAAGCCAAGTCACTTCA
	IND3-0448	SL4.0ch03:4,382,632	F: AGAAGATTCGCGCCCATTAT
			R: GCCACATGTAGGGTCTTTGG
	IND3-5470	SL4.0ch03:49,258,124	F: TGTTGGTTTTGCAAATCAGG
			R: TGCAGCCAGAGTTCAGACAT
	IND3-6289	SL4.0ch03:57,325,662	F: TGCTCCAAGAACTCCGGTAA
			R: ATGGTTCGATTCTTCGTTGC
	FW3.2	SL4.0ch03:59,219,937	F: AAAGTCGAATAAATTAGATGAACTTGA
			R: ATTGGGTCTCTCCTCGCTCT
	SSR320	SL4.0ch03:63,604,127	F: ATGAGGCAATCTTCACCTGG
			R: TTCAGCTGATAGTTCCTGCG
	SSR014	SL4.0ch03:64,198,992	F: TCTGCATCTGGTGAAGCAAG
			R: CTGGATTGCCTGGTTGATTT
	IND3-7057	SL4.0ch03:65,035,215	F: TCCAGACCATATACAGCACCTAAA
			R: CTCCAATGGGACCACTGTCT
4	IND4-0238	SL4.0ch04:2,413,372	F: TCACAATGGTAGGGGTAAGGTC
			R: CAAAGCATGTCAAGGTCTTCAA
	IND4-0954	SL4.0ch04:9,580,217	F: CAGCAATCCCTTGAAAGTGC
			R: AATCTTTCCCCAAGACATGC
	IND4-3519	SL4.0ch04:34,376,500	F: AGGCATGTGCTTCCATTTTT
			R: ACAACTGGCTACGATCCTGAA
	IND4-4286	SL4.0ch04:42,093,601	F: AAGACTGGTGTGCGGTGATT
			R: CCAATTTGAGAGCGATAGGC
	IND4-6168	SL4.0ch04:59,676,440	F: GGGAGATAACCTGCCATCAG
			R: TGCACCAGAGGTAAGTTAGGC
5	SSR115	SL4.0ch05:2,779,337	F: CACCCTTTATTCAGATTCCTCT
			R: ATTGAGGGTATGCAACAGCC
	IND5-0325	SL4.0ch05:3,300,671	F: CGGAAACGGCTTCTTTACC
			R: CGTGTGTAAGTTTTGTGCATTG
	IND5-0697	SL4.0ch05:7,037,638	F: CACTTCTCCGCTCCATCATT
			R: CATGTTTTTGCCATGGATGA
	IND5-1450	SL4.0ch05:14,557,724	F: TTGGAGGCATGTCACTCCTT
			R: GCAATTTCGGCCCTTTCTAC
	IND5-4612	SL4.0ch05:45,365,642	F: AGGTGATGGCTTTGAGTGTTG
			R: CACATCAATCTGCTCCATGC
	IND5-5411	SL4.0ch05:53,404,855	F: CATCAGACACCTCAAACACGA
			R: GAGAATTTGACACTCGAAACGA
	IND5-6112	SL4.0ch05:60,515,167	F: CGGTGGGAGGTGAAAGGTA
			R: CCACTTGTTTTCCAAATCAATACA
	SSR162	SL4.0ch05:64,854,176	F: GCTCTCTACAAGTGGAACTTTCTC
			R: CAACAGCCAGGAACAAGGAT
6	SSR211044	SL4.0ch06:1,015,396	F: AGCAGGGTAAGTCTCCAGCA
			R: CAAGACCATTGGTGTCTGTG
	IND6-3385	SL4.0ch06:31,581,118	F: AATCGCAACTGCAAAAGAAGA
			R: TATGGGCAAAAATGGATTGG
	IND6-3717	SL4.0ch06:34,971,254	F: TGGTTCATCTATGCCGGATT
			R: TCTCCAAATGCCAAGACAAA
	SSR128	SL4.0ch06:35,315,633	F: GGTCCAGTTCAATCAACCGA
			R: TGAAGTCGTCTCATGGTTCG
	IND6-4186	SL4.0ch06:43,137,732	F: GGTTGGAATAAATTCTAAAACAACATT
			R: ACAATGCTTCTCTATTAGGCAAA
	IND6-4561	SL4.0ch06:46,899,029	F: TGGTTTCAATGGGAGATTCA
			R: CGTGCTTAGCAATGATGGTG
7	IND7-0050	SL4.0ch07:487,557	F: CTTGACCTATTTAGCCAAGTTTTATAC
			R: TCTTTTCCAATGATCTAGCTGAGTA
	SSR286	SL4.0ch07:1,847,615	F: AGCTATGGAGTTTCAGGACCA
			R: ATTCAGGTAGCATGGAACGC
	SSR276	SL4.0ch07:7,500,501	F: CTCCGGCAAGAGTGAACATT
			R: CGACGGAGTACTTCGCATTT
	IND7-0918	SL4.0ch07:9,277,980	F: GTCCCAAACCAGAATCGAGA
			R: CATTTTGCACCACATCCAGA
	IND7-1436	SL4.0ch07:14,442,330	F: GAGAACTTGTTGCGTGTTCTTG
			R: CAGACGACAACGTGACAGGA
	IND7-4808	SL4.0ch07:47,874,530	F: GCTGACTGGTCTGGATGGAT
			R: CACGTATGAATTGGGCAACA
	IND7-6266	SL4.0ch07:62,585,355	F: CCAGCAGTTGTGTCATTAGAGC
			R: AAATAAGTTGGCGGTCATGAGT
	IND7-6489	SL4.0ch07:64,743,652	F: GGGAATGGAATGATGGTTTG
			R: CATCCAGGCCAGGTTGAA
	SSR045	SL4.0ch07:64,854,889	F: TGTATCCTGGTGGACCAATG
			R: TCCAAGTATCAGGCACACCA
	IND7-6590	SL4.0ch07:65,738,355	F: GTTGTTGAACTTAACCGTTCAAAG
			R: CCCATGTCTTGGAATATTGTGA
8	IND8-0171	SL4.0ch08:1,721,370	F: AAGATAGCAAGGAAGTTGAAGATCA
			R: AGTTGAACTTGCCGTGTGAA
	IND8-0367	SL4.0ch08:3,597,390	F: CTCTGCTGCTGCTGTCGT
			R: CTCACTACTCTCTCACCCTGACC
	SSR327	SL4.0ch08:50,681,183	F: TCAGGATCAGGAGCAGGAGT
			R: TGGACTTGTTCCATGAACCC
	IND8-5616	SL4.0ch08:54,272,619	F: CACTCTCAAGTCTTGTGTCATATTCA
			R: CCTCTAATTTCCTGGCAAGTGTA
	IND8-6049	SL4.0ch08:58,604,346	F: ATGAATAAAATATAGGAAGTCGCACA
			R: GAAAGAGCGAGCCTGCTG
	SSR063	SL4.0ch08:59,221,251	F: CCACAAACAATTCCATCTCA
			R: GCTTCCGCCATACTGATACG
	SSR038	SL4.0ch08:59,542,280	F: GTTTCTATAGCTGAAACTCAACCTG
			R: GGGTTCATCAAATCTACCATCA
	IND8-6206	SL4.0ch08:60,178,936	F: CCTCTGCTTGTCATCCCTTC
			R: ACGCTTTAGCTTACAACTACATCTTG
	IND8-6582	SL4.0ch08:63,974,144	F: AGCGAAAAGTGTACCCATTGA
			R: GGGTTGCATGAAATCTGGAC
9	IND9-0093	SL4.0ch09:954,425	F: AACACGATGGGGTGAAATGT
			R: GGAAGAATATTTCATGATGATTTTGAG
	IND9-0232	SL4.0ch09:2,363,020	F: ATGACTTAATTCGTTAACATATGACTG
			R: GACTCACATAATTGAAGTTCATTCG
	SSR069	SL4.0ch09:3,578,234	F: TTGGCTGGATTATTCCTGTTG
			R: GCATTTGATAGAAGGCCAGC
	SSR070	SL4.0ch09:3,663,546	F: TTTAGGGTGTCTGTGGGTCC
			R: GGAGTGCGCAGAGGATAGAG
	IND9-0744	SL4.0ch09:7,465,463	F: CTCTATGACCAGGCCAACG
			R: TTGGAGTTGTCATTTTCTGTGG
	IND9-5909	SL4.0ch09:55,162,504	F: AAAATGGGAAATGGCCAAAC
			R: AGACAGACCCTGCTCTAATACCA
	SSR110	SL4.0ch09:60,364,136	F: TGTAACGTCAAACTTCAGGTG
			R: CTCCGCAATGTGTTGTATGG
10	IND10-0015	SL4.0ch10:37,516	F: TTGAGAATGAGGGGGTGTTC
			R: TAACCACCCACGACTTAGCC
	SSR596	SL4.0ch10:2,707,998	F: TTCGGATAAAGCAATCCACC
			R: TCGATTGTGTACCAACGTCC
	IND10-0429	SL4.0ch10:4,087,865	F: ATATTCGGCGTCATTTAGGC
			R: GGTCGATCGTTTACTTTTCGAT
	IND10-0939	SL4.0ch10:9,069,669	F: CACAAACTTGCGACAACTCAA
			R: TGACCTTTATTGAGGCTGGTG
	SSR318	SL4.0ch10:55,882,817	F: GCAGAGGATATTGCATTCGC
			R: CAAACCGAACTCATCAAGGG
	IND10-6196	SL4.0ch10:61,747,181	F: GGGGTCAGTGGAACAGAAGA
			R: TCCTTCCCCACCCTCTTTTA
11	IND11-0017	SL4.0ch11:186,598	F: CATTCCTGTGAAGGCAATATGA
			R: GATGTGCTATCAAATAGATGGATGA
	SSR080	SL4.0ch11:2,309,947	F: GGCAAATGTCAAAGGATTGG
			R: AGGGTCATGTTCTTGATTGTCA
	IND11-0530	SL4.0ch11:5,088,749	F: TTTATCTTGCATTTGGTGTTGG
			R: ACCCAGCTAAAAGAATGAAGTCG
	IND11-4108	SL4.0ch11:39,814,279	F: GTTCATTAAATTATTTTGTGGGGAGT
			R: TGTTTAGTCGAAACTTCACTATCTCC
	IND11-5266	SL4.0ch11:50,697,741	F: CAATTGACACAGTGGAGATAAGTTG
			R: TGCATTATCTTGGGCAGAAA
	SSRG036	SL4.0ch11:52,470,928	F: TGTTTTAAACTGAAGATGTGTAAAATG
			R: TGAATGAGCAAGTTAAACAGTAAGG
	FAS	SL4.0ch11:52,946,405	*F1: CCAATGATAATTAAGATATTGTGACG
			*F2: ATGGTGGGGTTTTCTGTTCA
			R: CAGAAATCAGAGTCCAATTCCA
	SSR1061	SL4.0ch11:53,236,788	F: TCAGGTTAGTGTTCCATGCAG
			R: GTTCCTACGTAAGATTCATG
	IND11-5323	SL4.0ch11:54,214,603	F: AAGACAAACATGCCAGCCTTA
			R: TTGGAATAAACAAAAACAACAATCA
12	IND12-0038	SL4.0ch12:401,630	F: GACGAAGCATCTCAGATTCACA
			R: TCTTTTGTTTGGGTTTTGCTC
	IND12-0379	SL4.0ch12:3,831,421	F: AGGGTCTGGCTTAGGCAAAT
			R: TGCTATTTTTATGAGCAGATGGTT
	IND12-0670	SL4.0ch12:6,751,549	F: AGGCTTGTTTGGGTGTATCG
			R: TGTCTAACAAACAAGGCATTCAA
	IND12-1197	SL4.0ch12:12,097,075	F: GGCATTCTCTAGGCAACAGC
			R: GCCAGCTAGCTCGATTTGTC
	IND12-6230	SL4.0ch12:61,905,584	F: ACCTCATGTTCTCAACCCACTT
			R: AATCAAGGATAAGTTGTGGTGCT
F: forward primer; R: reverse primer.
*F1: forward primer in presence of the insertion; *F2: forward primer in absence of the insertion.

## Sheet: TableS3
Table S3. Differentially expressed proteins (DEPs) between mature green (MG) and red ripe (RR) in Caimanta (CAI) of S. lycopersicum. The empirical Bayes analysis pipeline of Bioconductor limma package was used to obtain the DEPs by comparing RR - MG. A p-value < 0.05 and |log2 FoldChange| ≥ 1 were set to determine significantly increased abundant proteins in MG or RR stages.
Accession	Solyc	Description	t_statistic	P_Value	B(Bayes)	log2FoldChange	increased_abundance
A0A3Q7IRF9	Solyc11g010990.2.1	PKS_ER domain-containing protein OS=Solanum lycopersicum OX=4081 PE=3 SV=1	6.71281	3.04e-05	2.52405	-6.6963	MG
A0A3Q7I593	Solyc09g063130.3.1	Uncharacterized protein OS=Solanum lycopersicum OX=4081 GN=101266666 PE=3 SV=1	6.00722	8.2e-05	1.70517	-4.8747	MG
A0A3Q7G3C1	Solyc04g064670.3.1	23 kDa subunit of oxygen evolving system of photosystem II OS=Solanum lycopersicum OX=4081 PE=3 SV=1	5.68366	0.000132282	1.30116	-2.648	MG
A0A3Q7G9S2	Solyc04g077615.1.1	Peptidylprolyl isomerase OS=Solanum lycopersicum OX=4081 PE=3 SV=1	5.2445	0.000259127	0.723478	-3.30483	MG
B1N678	Solyc07g007750.3.1	Defensin protein OS=Solanum lycopersicum OX=4081 GN=543741 PE=4 SV=1	-4.99554	0.000383997	0.380974	3.3401	RR
A0A3Q7I7N1	Solyc07g049440.3.1	Uncharacterized protein OS=Solanum lycopersicum OX=4081 GN=101266652 PE=3 SV=1	4.96697	0.000401953	0.340977	-4.32563	MG
A0A3Q7EZ95	Solyc02g063490.3.1	Malate dehydrogenase OS=Solanum lycopersicum OX=4081 GN=101249428 PE=3 SV=1	4.57919	0.000755812	-0.215512	-2.9254	MG
A0A3Q7FVS7	Solyc03g121640.3.1	Uncharacterized protein OS=Solanum lycopersicum OX=4081 GN=101265626 PE=3 SV=1	-4.56212	0.000777489	-0.240587	1.63453	RR
A0A3Q7IAU4	Solyc10g007600.3.1	(S)-2-hydroxy-acid oxidase OS=Solanum lycopersicum OX=4081 GN=100134875 PE=3 SV=1	4.35232	0.001104	-0.552494	-3.21537	MG
A0A3Q7HLD0	Solyc06g034120.3.1	PKS_ER domain-containing protein OS=Solanum lycopersicum OX=4081 GN=101250123 PE=3 SV=1	4.22229	0.0013759	-0.749191	-1.9584	MG
A0A3Q7FEG3	Solyc03g020060.3.1	Uncharacterized protein OS=Solanum lycopersicum OX=4081 GN=104646135 PE=3 SV=1	-4.16771	0.00151008	-0.832501	2.35377	RR
Q2MIA5	Solyc09g055950.1.1	Photosystem II D2 protein OS=Solanum lycopersicum OX=4081 GN=psbD PE=3 SV=1	4.16141	0.00152642	-0.842141	-2.96167	MG
P12372	Solyc06g054260.1.1.1	Photosystem I reaction center subunit II, chloroplastic OS=Solanum lycopersicum OX=4081 GN=psaD PE=2 SV=1	4.04933	0.00185005	-1.01462	-3.8193	MG
Q2MIC0	Solyc05g016120.1.1	Photosystem II protein D1 OS=Solanum lycopersicum OX=4081 GN=psbA PE=3 SV=1	4.02415	0.00193213	-1.0536	-3.741	MG
A0A3Q7ES60	Solyc01g008160.3.1.1	TPR_REGION domain-containing protein OS=Solanum lycopersicum OX=4081 PE=4 SV=1	-4.02294	0.00193616	-1.05548	3.8038	RR
A0A3Q7HQA3	Solyc08g065220.3.1	Glycine cleavage system P protein OS=Solanum lycopersicum OX=4081 GN=101260070 PE=3 SV=1	3.89114	0.00243291	-1.26089	-1.9405	MG
P43282	Solyc09g008280.2.1.1	S-adenosylmethionine synthase 3 OS=Solanum lycopersicum OX=4081 GN=SAM3 PE=2 SV=1	3.86767	0.00253442	-1.29769	-2.78427	MG
A0A3Q7GCM6	Solyc04g082640.3.1	Uncharacterized protein OS=Solanum lycopersicum OX=4081 GN=101264321 PE=4 SV=1	3.85225	0.00260348	-1.32191	-1.71617	MG
P23322	Solyc02g065400.3.1	Oxygen-evolving enhancer protein 1, chloroplastic OS=Solanum lycopersicum OX=4081 GN=PSBO PE=2 SV=2	3.84764	0.0026245	-1.32915	-2.40987	MG
A0A3Q7ESV2	Solyc01g106090.3.1	23 kDa subunit of oxygen evolving system of photosystem II OS=Solanum lycopersicum OX=4081 GN=101264980 PE=3 SV=1	3.6552	0.00367852	-1.63368	-3.1973	MG
Q9FZ05	Solyc07g009380.3.1	Xyloglucan endotransglucosylase/hydrolase OS=Solanum lycopersicum OX=4081 GN=LeXET2 PE=2 SV=1	3.57954	0.00420472	-1.75443	-3.10707	MG
A0A3Q7I0X4	Solyc09g014520.3.1	Chlorophyll a-b binding protein, chloroplastic OS=Solanum lycopersicum OX=4081 GN=101249002 PE=3 SV=1	3.56769	0.00429387	-1.77339	-3.1869	MG
A0A3Q7H0S6	Solyc06g076480.3.1	Uncharacterized protein OS=Solanum lycopersicum OX=4081 PE=4 SV=1	3.48742	0.00495129	-1.90213	-2.2218	MG
A0A3Q7FD98	Solyc01g108880.3.1	Fe2OG dioxygenase domain-containing protein OS=Solanum lycopersicum OX=4081 PE=3 SV=1	-3.43206	0.00546396	-1.99119	2.17903	RR
Q2MIA4	Solyc10g047410.1.1	Photosystem II CP43 reaction center protein OS=Solanum lycopersicum OX=4081 GN=psbC PE=3 SV=1	3.429	0.00549387	-1.99613	-2.54173	MG
A0A3Q7H040	Solyc06g074870.2.1	Uncharacterized protein OS=Solanum lycopersicum OX=4081 PE=4 SV=1	3.41892	0.00559351	-2.01237	-1.6955	MG
A0A3Q7FVD6	Solyc03g120240.3.1	Uncharacterized protein OS=Solanum lycopersicum OX=4081 PE=4 SV=1	3.39019	0.00588758	-2.0587	-1.62393	MG
A0A3Q7FLG3	Solyc02g067360.3.1	PDZ domain-containing protein OS=Solanum lycopersicum OX=4081 GN=101267480 PE=3 SV=1	3.36861	0.00611886	-2.09353	-2.3429	MG
A0A3Q7EI02	Solyc01g080410.3.1	Peptide-methionine (R)-S-oxide reductase OS=Solanum lycopersicum OX=4081 GN=101266452 PE=3 SV=1	-3.35764	0.00623999	-2.11125	1.59927	RR
Q672Q6	Solyc02g079950.3.1	Photosystem II oxygen-evolving complex protein 3 OS=Solanum lycopersicum OX=4081 GN=PsbQ PE=2 SV=1	3.34438	0.00638968	-2.13268	-2.08643	MG
A0A3Q7GRY3	Solyc06g051200.3.1	Uncharacterized protein OS=Solanum lycopersicum OX=4081 GN=101247532 PE=3 SV=1	3.3115	0.00677679	-2.18585	-2.22527	MG
A0A3Q7H7F3	Solyc07g032640.2.1	Uncharacterized protein OS=Solanum lycopersicum OX=4081 PE=3 SV=1	3.30718	0.00682942	-2.19285	-2.7697	MG
G8XSL1	Solyc08g081010.3.1	Gamma-ECS OS=Solanum lycopersicum OX=4081 GN=543536 PE=2 SV=1	-3.29994	0.00691842	-2.20455	3.0012	RR
Q2MI75	Solyc01g007500.2.1	Photosystem II CP47 reaction center protein OS=Solanum lycopersicum OX=4081 GN=psbB PE=3 SV=1	3.27156	0.00727923	-2.2505	-2.75187	MG
A0A3Q7IMD9	Solyc10g083970.1.1.1	S-adenosylmethionine synthase OS=Solanum lycopersicum OX=4081 GN=101245012 PE=3 SV=1	3.19887	0.00829317	-2.36835	-1.64793	MG
A0A3Q7HZM0	Solyc09g010130.3.1	PX domain-containing protein OS=Solanum lycopersicum OX=4081 PE=3 SV=1	3.1895	0.00843388	-2.38355	-2.33783	MG
A0A3Q7IZR8	Solyc11g066680.2.1	Uncharacterized protein OS=Solanum lycopersicum OX=4081 PE=3 SV=1	3.17487	0.00865846	-2.4073	-2.25633	MG
A0A3Q7F163	Solyc01g079870.3.1	CBFD_NFYB_HMF domain-containing protein OS=Solanum lycopersicum OX=4081 PE=4 SV=1	3.16854	0.0087576	-2.41758	-3.72477	MG
A0A3Q7ILP6	Solyc10g083650.1.1.1	Glutaredoxin-dependent peroxiredoxin OS=Solanum lycopersicum OX=4081 GN=104644379 PE=3 SV=1	-3.14155	0.00919286	-2.46139	1.29513	RR
A0A3Q7J418	Solyc12g010380.2.1	ATP:AMP phosphotransferase OS=Solanum lycopersicum OX=4081 PE=3 SV=1	3.13521	0.00929832	-2.47169	-1.5387	MG
A0A3Q7FAE2	Solyc02g086910.3.1	Peptidylprolyl isomerase OS=Solanum lycopersicum OX=4081 PE=4 SV=1	3.11663	0.00961422	-2.50186	-2.885	MG
A0A3Q7F9B8	Solyc02g088690.3.1.1	UDP-glucose 6-dehydrogenase OS=Solanum lycopersicum OX=4081 PE=3 SV=1	3.11347	0.00966901	-2.50699	-2.1649	MG
A0A3Q7F9P6	Solyc02g086830.3.1	PDZ domain-containing protein OS=Solanum lycopersicum OX=4081 GN=101250650 PE=3 SV=1	3.10401	0.00983512	-2.52237	-1.5293	MG
A0A3Q7FSS5	Solyc03g114930.3.1	23 kDa subunit of oxygen evolving system of photosystem II OS=Solanum lycopersicum OX=4081 GN=101259227 PE=3 SV=1	3.06819	0.01049	-2.58055	-2.11357	MG
A0A3Q7FRE5	Solyc03g114450.3.1	Rhodanese domain-containing protein OS=Solanum lycopersicum OX=4081 GN=101268560 PE=4 SV=1	3.05122	0.0108156	-2.60813	-2.9106	MG
A0A3Q7J1C7	Solyc12g005180.2.1	Lipocln_cytosolic_FA-bd_dom domain-containing protein OS=Solanum lycopersicum OX=4081 GN=101260607 PE=3 SV=1	3.02495	0.0113397	-2.65082	-1.88217	MG
P43280	Solyc01g101060.2.1	S-adenosylmethionine synthase 1 OS=Solanum lycopersicum OX=4081 GN=SAM1 PE=2 SV=1	3.00604	0.0117327	-2.68154	-1.16583	MG
A0A3Q7HGQ5	Solyc07g056490.3.1	Uncharacterized protein OS=Solanum lycopersicum OX=4081 PE=4 SV=1	-2.97676	0.0123684	-2.7291	1.86457	RR
A0A3Q7HE62	Solyc07g062130.3.1	Uncharacterized protein OS=Solanum lycopersicum OX=4081 GN=101249663 PE=4 SV=1	2.96273	0.0126851	-2.75189	-2.47213	MG
P29000	Solyc03g083910.2.1	Acid beta-fructofuranosidase OS=Solanum lycopersicum OX=4081 GN=TIV1 PE=2 SV=1	-2.95008	0.0129775	-2.77243	1.80253	RR
A0A3Q7J3Y8	Solyc12g009180.2.1	Cupin_5 domain-containing protein OS=Solanum lycopersicum OX=4081 GN=101251550 PE=4 SV=1	2.87227	0.0149321	-2.89871	-1.2307	MG
A0A3Q7I0B7	Solyc09g011470.3.1	Uncharacterized protein OS=Solanum lycopersicum OX=4081 GN=101243814 PE=4 SV=1	-2.86197	0.015212	-2.91541	2.12687	RR
A0A3Q7JEH3	Solyc12g099000.2.1	S-adenosylmethionine synthase OS=Solanum lycopersicum OX=4081 PE=3 SV=1	2.81508	0.0165537	-2.99137	-1.32553	MG
A0A3Q7GQZ4	Solyc05g056230.3.1	Calreticulin OS=Solanum lycopersicum OX=4081 PE=3 SV=1	2.80508	0.016855	-3.00758	-1.17217	MG
A0A3Q7EMC7	Solyc01g097300.3.1	Prefoldin subunit 4 OS=Solanum lycopersicum OX=4081 PE=3 SV=1	-2.79464	0.017175	-3.02446	1.35017	RR
A0A3Q7FUS2	Solyc03g119860.3.1	PPIase cyclophilin-type domain-containing protein OS=Solanum lycopersicum OX=4081 GN=101257251 PE=4 SV=1	2.79073	0.0172964	-3.03078	-2.1695	MG
Q40129	Solyc11g022590.1.1.1	Uncharacterized protein OS=Solanum lycopersicum OX=4081 GN=544001 PE=2 SV=1	2.74727	0.0187054	-3.10104	-1.50247	MG
P30264	Solyc12g094620.1.1	Catalase isozyme 1 OS=Solanum lycopersicum OX=4081 GN=CAT1 PE=2 SV=1	2.73684	0.01906	-3.11788	-1.5764	MG
A0A3Q7F107	Solyc01g079610.3.1	J domain-containing protein OS=Solanum lycopersicum OX=4081 GN=101246562 PE=4 SV=1	2.68128	0.0210651	-3.20745	-1.09987	MG
P93224	Solyc10g075090.2.1	Non-specific lipid-transfer protein 2 OS=Solanum lycopersicum OX=4081 GN=LE16 PE=2 SV=1	-2.67515	0.0212986	-3.21731	1.7043	RR
A0A3Q7GR39	Solyc06g048530.3.1	Lactamase_B domain-containing protein OS=Solanum lycopersicum OX=4081 PE=3 SV=1	2.65982	0.0218943	-3.24199	-1.24733	MG
A0A3Q7FBY4	Solyc01g106430.3.1	Inorganic diphosphatase OS=Solanum lycopersicum OX=4081 GN=101253833 PE=3 SV=1	2.65513	0.0220797	-3.24952	-1.1567	MG
A0A3Q7J7R7	Solyc12g038630.2.1	BSD domain-containing protein OS=Solanum lycopersicum OX=4081 PE=4 SV=1	2.64268	0.0225794	-3.26952	-1.1077	MG
A0A3Q7GDE7	Solyc05g007100.3.1	Uncharacterized protein OS=Solanum lycopersicum OX=4081 PE=3 SV=1	2.63836	0.0227553	-3.27646	-1.26297	MG
A0A3Q7H0L5	Solyc06g069530.3.1	Biotin carboxyl carrier protein of acetyl-CoA carboxylase OS=Solanum lycopersicum OX=4081 GN=101259549 PE=4 SV=1	2.63064	0.0230734	-3.28886	-2.46953	MG
A0A3Q7IR77	Solyc11g007960.2.1	Uncharacterized protein OS=Solanum lycopersicum OX=4081 GN=101260594 PE=4 SV=1	2.57825	0.0253496	-3.37281	-1.50033	MG
A0A3Q7FVJ9	Solyc03g121330.3.1	Ribosomal_L28e domain-containing protein OS=Solanum lycopersicum OX=4081 GN=101247801 PE=3 SV=1	2.53592	0.0273486	-3.44041	-2.50917	MG
A0A3Q7FY03	Solyc03g123830.3.1	D-3-phosphoglycerate dehydrogenase OS=Solanum lycopersicum OX=4081 GN=101266918 PE=3 SV=1	2.53107	0.0275873	-3.44814	-1.93873	MG
A0A3Q7ELF6	Solyc01g091750.3.1	Uncharacterized protein OS=Solanum lycopersicum OX=4081 PE=4 SV=1	2.5176	0.0282612	-3.4696	-1.75007	MG
A0A3Q7IP97	Solyc10g086150.2.1	Uncharacterized protein OS=Solanum lycopersicum OX=4081 GN=101255645 PE=4 SV=1	2.50148	0.0290886	-3.49525	-2.24637	MG
A0A3Q7IIH8	Solyc10g074580.2.1	Uncharacterized protein OS=Solanum lycopersicum OX=4081 PE=4 SV=1	-2.50107	0.0291099	-3.4959	2.07727	RR
A0A3Q7H7R1	Solyc07g008720.3.1	Nascent polypeptide-associated complex subunit beta OS=Solanum lycopersicum OX=4081 PE=3 SV=1	2.48657	0.0298746	-3.51893	-1.5241	MG
D3TI69	Solyc01g081610.3.1	Beta-hexosaminidase OS=Solanum lycopersicum OX=4081 GN=100529103 PE=2 SV=1	-2.48518	0.029949	-3.52114	2.19173	RR
A0A3Q7FSE5	Solyc03g114150.3.1	Aldedh domain-containing protein OS=Solanum lycopersicum OX=4081 GN=101250104 PE=3 SV=1	2.48233	0.0301022	-3.52566	-1.3383	MG
P14278	Solyc07g047850.2.1	Chlorophyll a-b binding protein 4, chloroplastic OS=Solanum lycopersicum OX=4081 GN=CAB4 PE=2 SV=1	2.46297	0.0311615	-3.55635	-2.6229	MG
A0A3Q7FY64	Solyc04g008520.3.1	Uncharacterized protein OS=Solanum lycopersicum OX=4081 GN=101254189 PE=4 SV=1	2.44578	0.0321334	-3.58357	-1.9723	MG
A0A3Q7FES6	Solyc03g005227.1.1	Histone H2A OS=Solanum lycopersicum OX=4081 GN=101255365 PE=3 SV=1	2.4356	0.0327223	-3.59966	-1.9513	MG
P28554	Solyc03g123760.3.1	15-cis-phytoene desaturase, chloroplastic/chromoplastic OS=Solanum lycopersicum OX=4081 GN=PDS PE=1 SV=1	-2.42387	0.0334142	-3.61819	1.458	RR
A0A3Q7F355	Solyc02g076710.3.1	Uncharacterized protein OS=Solanum lycopersicum OX=4081 GN=101246497 PE=3 SV=1	-2.42282	0.0334768	-3.61984	1.39883	RR
A0A3Q7F0P2	Solyc02g067080.3.1.1	UDP-glucose 6-dehydrogenase OS=Solanum lycopersicum OX=4081 PE=3 SV=1	2.42268	0.0334852	-3.62007	-1.3579	MG
A0A3Q7HFB9	Solyc07g064160.3.1	Thiamine thiazole synthase, chloroplastic OS=Solanum lycopersicum OX=4081 GN=101257192 PE=3 SV=1	2.41019	0.0342386	-3.63975	-3.13457	MG
A0A3Q7EU63	Solyc01g111510.3.1	PEROXIDASE_4 domain-containing protein OS=Solanum lycopersicum OX=4081 GN=101264261 PE=3 SV=1	2.40956	0.0342771	-3.64075	-1.77207	MG
A0A3Q7IQR1	Solyc11g008630.2.1	Uncharacterized protein OS=Solanum lycopersicum OX=4081 GN=101249696 PE=3 SV=1	2.40458	0.0345827	-3.64859	-1.53557	MG
A0A3Q7FKK5	Solyc03g082890.3.1	Uncharacterized protein OS=Solanum lycopersicum OX=4081 PE=4 SV=1	2.39528	0.0351604	-3.66324	-1.72437	MG
A0A3Q7E957	Solyc01g008950.3.1	Uncharacterized protein OS=Solanum lycopersicum OX=4081 GN=101256315 PE=4 SV=1	-2.35324	0.0378892	-3.72921	1.18627	RR
A0A3Q7IMG0	Solyc10g083110.2.1	4-hydroxy-tetrahydrodipicolinate synthase OS=Solanum lycopersicum OX=4081 PE=3 SV=1	2.34497	0.0384498	-3.74216	-2.36523	MG
Q0PY39	Solyc02g077880.3.1	Auxin repressed/dormancy associated protein OS=Solanum lycopersicum OX=4081 GN=101258429 PE=3 SV=1	2.33953	0.0388224	-3.75066	-2.1862	MG
A0A3Q7G3H5	Solyc03g025310.3.1	Uncharacterized protein OS=Solanum lycopersicum OX=4081 PE=4 SV=1	2.33814	0.0389183	-3.75283	-1.93487	MG
A0A3Q7IZI6	Solyc11g067160.2.1	Aldo_ket_red domain-containing protein OS=Solanum lycopersicum OX=4081 GN=101254562 PE=4 SV=1	-2.3328	0.0392889	-3.76118	1.95587	RR
A0A3Q7HRB7	Solyc08g076920.3.1	Arf-GAP domain-containing protein OS=Solanum lycopersicum OX=4081 GN=101244022 PE=4 SV=1	2.32999	0.0394855	-3.76557	-1.06473	MG
A0A3Q7IKV0	Solyc08g067840.3.1	23 kDa subunit of oxygen evolving system of photosystem II OS=Solanum lycopersicum OX=4081 GN=101249944 PE=3 SV=1	2.32848	0.0395914	-3.76793	-2.45527	MG
A0A3Q7E7B4	Solyc01g005520.3.1	Uncharacterized protein OS=Solanum lycopersicum OX=4081 GN=101254513 PE=4 SV=1	2.32411	0.0398993	-3.77475	-1.04197	MG
A0A3Q7GM40	Solyc06g005710.3.1	NAD(P)-bd_dom domain-containing protein OS=Solanum lycopersicum OX=4081 GN=101257969 PE=4 SV=1	2.32105	0.0401159	-3.77951	-3.06897	MG
P27065	Solyc01g007330.2.1	Ribulose bisphosphate carboxylase large chain OS=Solanum lycopersicum OX=4081 GN=rbcL PE=1 SV=4	2.30914	0.0409718	-3.79808	-1.06337	MG
Q08307	Solyc08g074620.1.1	Polyphenol oxidase E, chloroplastic OS=Solanum lycopersicum OX=4081 PE=3 SV=1	2.30502	0.0412715	-3.80449	-1.9372	MG
A0A3Q7H3V2	Solyc04g082250.3.1	AAA domain-containing protein OS=Solanum lycopersicum OX=4081 GN=100037730 PE=3 SV=1	2.2963	0.0419137	-3.81806	-1.8229	MG
A0A3Q7H3C5	Solyc07g005390.3.1	Aldedh domain-containing protein OS=Solanum lycopersicum OX=4081 GN=101262732 PE=3 SV=1	2.28751	0.0425702	-3.83171	-1.01963	MG
A0A3Q7HW47	Solyc09g007900.3.1	Phenylalanine ammonia-lyase OS=Solanum lycopersicum OX=4081 PE=3 SV=1	2.28371	0.0428575	-3.83761	-2.74457	MG
Q4VUC5	Solyc02g079930.3.1	Phosphosulfolactate synthase-related protein OS=Solanum lycopersicum OX=4081 GN=PSR PE=2 SV=1	-2.27562	0.0434745	-3.85016	2.3808	RR
A0A3Q7FTT4	Solyc03g117040.3.1	Uncharacterized protein OS=Solanum lycopersicum OX=4081 PE=4 SV=1	2.27494	0.0435264	-3.8512	-2.50483	MG
A0A3Q7GDF2	Solyc05g005865.1.1	Bet_v_1 domain-containing protein OS=Solanum lycopersicum OX=4081 PE=4 SV=1	2.27492	0.0435279	-3.85123	-1.50147	MG
A0A3Q7J6X7	Solyc10g008740.3.1	Mg-protoporphyrin IX chelatase OS=Solanum lycopersicum OX=4081 GN=101255435 PE=3 SV=1	2.2641	0.0443678	-3.868	-2.1841	MG
A0A3Q7G4N1	Solyc03g032000.3.1	Thioredoxin reductase OS=Solanum lycopersicum OX=4081 GN=101260797 PE=3 SV=1	-2.26311	0.0444458	-3.86954	1.0229	RR
A0A3Q7H2D0	Solyc06g072845.1.1	Uncharacterized protein OS=Solanum lycopersicum OX=4081 PE=4 SV=1	-2.26205	0.0445286	-3.87117	1.44563	RR
A0A3Q7J4Q2	Solyc12g013580.2.1	PPIase cyclophilin-type domain-containing protein OS=Solanum lycopersicum OX=4081 PE=4 SV=1	2.25617	0.0449929	-3.88026	-1.63883	MG
A0A3Q7GSM2	Solyc06g050130.3.1	Alpha-galactosidase OS=Solanum lycopersicum OX=4081 GN=101257269 PE=3 SV=1	2.25571	0.0450298	-3.88098	-1.02167	MG
A0A3Q7JM05	Solyc11g042640.2.1	Rieske domain-containing protein OS=Solanum lycopersicum OX=4081 GN=101267576 PE=4 SV=1	2.24463	0.0459184	-3.89809	-1.65587	MG
A0A3Q7GNM9	Solyc05g051850.3.1	Inositol-3-phosphate synthase OS=Solanum lycopersicum OX=4081 GN=543809 PE=3 SV=1	2.24146	0.0461759	-3.90299	-2.22117	MG
A0A3Q7J162	Solyc11g070050.2.1	Uncharacterized protein OS=Solanum lycopersicum OX=4081 GN=101250366 PE=4 SV=1	-2.2331	0.0468608	-3.91587	1.26607	RR
A0A3Q7HHL0	Solyc08g006890.3.1	Tubulin alpha chain OS=Solanum lycopersicum OX=4081 GN=101254013 PE=3 SV=1	2.22722	0.0473485	-3.92493	-1.4297	MG
A0A3Q7I6S0	Solyc09g072900.3.1	DLH domain-containing protein OS=Solanum lycopersicum OX=4081 PE=4 SV=1	2.21974	0.0479762	-3.93644	-1.407	MG
A0A3Q7FWX0	Solyc04g009960.3.1	Beta_elim_lyase domain-containing protein OS=Solanum lycopersicum OX=4081 GN=101247807 PE=3 SV=1	2.21866	0.0480671	-3.9381	-1.61063	MG
A0A3Q7HUR4	Solyc08g078510.3.1	GRAM domain-containing protein OS=Solanum lycopersicum OX=4081 GN=101259275 PE=3 SV=1	-2.20976	0.0488251	-3.95176	1.10477	RR
A0A3Q7GN86	Solyc05g053430.3.1	DNA-directed RNA polymerase subunit OS=Solanum lycopersicum OX=4081 GN=101264221 PE=3 SV=1	-2.20758	0.0490127	-3.95511	1.2339	RR
Q9AXQ5	Solyc07g005560.3.1	Eukaryotic translation initiation factor 5A-2 OS=Solanum lycopersicum OX=4081 PE=2 SV=1	2.20547	0.0491947	-3.95835	-1.02157	MG
P05117	Solyc10g080210.2.1	Polygalacturonase-2 OS=Solanum lycopersicum OX=4081 GN=PG2 PE=1 SV=1	-2.20497	0.0492383	-3.95912	3.21957	RR
A0A3Q7HHE9	Solyc08g006540.3.1	Peptidylprolyl isomerase OS=Solanum lycopersicum OX=4081 PE=4 SV=1	2.20183	0.0495104	-3.96393	-1.09887	MG

## Sheet: TableS4
Table S4. Differentially expressed proteins (DEPs) between mature green (MG) and red ripe (RR) in LA0722 of S. pimpinellifolium. The empirical Bayes analysis pipeline of Bioconductor limma package was used to obtain the DEPs by comparing RR - MG. A p-value < 0.05 and |log2 FoldChange| ≥ 1 were set to determine significantly increased abundant proteins in MG or RR stages.
Accession	Solyc	Description	t_statistic	P_Value	B(Bayes)	log2FoldChange	increased_abundance
A0A3Q7G3C1	Solyc04g064670.3.1	23 kDa subunit of oxygen evolving system of photosystem II OS=Solanum lycopersicum OX=4081 PE=3 SV=1	10.4368	4.13e-07	6.59828	-4.86247	MG
A0A3Q7ESN2	Solyc01g108560.3.1	Uncharacterized protein OS=Solanum lycopersicum OX=4081 PE=3 SV=1	-7.62223	9.28e-06	3.89899	3.2811	RR
Q672Q6	Solyc02g079950.3.1	Photosystem II oxygen-evolving complex protein 3 OS=Solanum lycopersicum OX=4081 GN=PsbQ PE=2 SV=1	7.16066	1.67e-05	3.36047	-4.46727	MG
A0A3Q7EN13	Solyc01g098640.3.1	TPM_phosphatase domain-containing protein OS=Solanum lycopersicum OX=4081 GN=101258104 PE=4 SV=1	7.00453	2.05e-05	3.17133	-5.81763	MG
Q2MI49	Solyc02g011760.1.1	Photosystem I iron-sulfur center OS=Solanum lycopersicum OX=4081 GN=psaC PE=3 SV=1	6.91578	2.31e-05	3.06219	-4.28723	MG
A0A3Q7IRF9	Solyc11g010990.2.1	PKS_ER domain-containing protein OS=Solanum lycopersicum OX=4081 PE=3 SV=1	6.87544	2.44e-05	3.0122	-6.85853	MG
A0A3Q7EI02	Solyc01g080410.3.1	Peptide-methionine (R)-S-oxide reductase OS=Solanum lycopersicum OX=4081 GN=101266452 PE=3 SV=1	-6.69814	3.1e-05	2.78954	3.19037	RR
P12372	Solyc06g054260.1.1.1	Photosystem I reaction center subunit II, chloroplastic OS=Solanum lycopersicum OX=4081 GN=psaD PE=2 SV=1	6.37816	4.83e-05	2.3755	-6.01583	MG
A0A3Q7I593	Solyc09g063130.3.1	Uncharacterized protein OS=Solanum lycopersicum OX=4081 GN=101266666 PE=3 SV=1	6.28223	5.53e-05	2.24827	-5.09787	MG
P29000	Solyc03g083910.2.1	Acid beta-fructofuranosidase OS=Solanum lycopersicum OX=4081 GN=TIV1 PE=2 SV=1	-6.23955	5.87e-05	2.1912	3.81243	RR
A0A3Q7HIX0	Solyc08g014130.3.1	2-isopropylmalate synthase OS=Solanum lycopersicum OX=4081 PE=3 SV=1	-5.92124	9.3e-05	1.75641	4.46243	RR
A0A3Q7G067	Solyc04g040180.3.1	Methyltransf_11 domain-containing protein OS=Solanum lycopersicum OX=4081 GN=101256176 PE=4 SV=1	-5.7043	0.000128253	1.45082	3.78373	RR
A0A3Q7I6G7	Solyc09g082330.2.1	Uncharacterized protein OS=Solanum lycopersicum OX=4081 PE=4 SV=1	5.66926	0.000135171	1.40076	-6.7658	MG
A0A3Q7FKK5	Solyc03g082890.3.1	Uncharacterized protein OS=Solanum lycopersicum OX=4081 PE=4 SV=1	5.62548	0.00014438	1.33792	-4.0498	MG
Q2MIA5	Solyc09g055950.1.1	Photosystem II D2 protein OS=Solanum lycopersicum OX=4081 GN=psbD PE=3 SV=1	5.57966	0.000154733	1.27184	-3.97103	MG
A0A3Q7I4H8	Solyc09g065870.3.1	VWFA domain-containing protein OS=Solanum lycopersicum OX=4081 PE=4 SV=1	-5.57172	0.000156607	1.26034	2.87173	RR
A0A3Q7I4W4	Solyc09g072560.3.1	Uncharacterized protein OS=Solanum lycopersicum OX=4081 GN=101252924 PE=3 SV=1	5.45202	0.000187954	1.08595	-6.80723	MG
P23322	Solyc02g065400.3.1	Oxygen-evolving enhancer protein 1, chloroplastic OS=Solanum lycopersicum OX=4081 GN=PSBO PE=2 SV=2	5.4152	0.000198885	1.03185	-3.39167	MG
A0A3Q7F355	Solyc02g076710.3.1	Uncharacterized protein OS=Solanum lycopersicum OX=4081 GN=101246497 PE=3 SV=1	-5.40104	0.000203268	1.01098	3.11833	RR
A0A3Q7EMN1	Solyc01g097880.3.1	CMP/dCMP-type deaminase domain-containing protein OS=Solanum lycopersicum OX=4081 PE=4 SV=1	-5.29156	0.000240801	0.848581	2.68257	RR
P10967	Solyc09g089580.2.1	1-aminocyclopropane-1-carboxylate oxidase homolog OS=Solanum lycopersicum OX=4081 GN=ACO3 PE=2 SV=1	-5.0579	0.000347684	0.495645	5.9885	RR
A0A3Q7IRF8	Solyc11g011390.2.1	Glutamine synthetase OS=Solanum lycopersicum OX=4081 PE=3 SV=1	-5.00295	0.000379479	0.411402	3.10317	RR
A0A3Q7F0H8	Solyc02g067840.3.1	Uncharacterized protein OS=Solanum lycopersicum OX=4081 GN=101256549 PE=4 SV=1	-4.96013	0.000406378	0.345434	3.23737	RR
A0A3Q7HHW7	Solyc07g064690.1.1.1	Uncharacterized protein OS=Solanum lycopersicum OX=4081 GN=101245381 PE=4 SV=1	-4.92485	0.000430055	0.290859	2.39193	RR
A0A3Q7IIZ3	Solyc08g062340.3.1.1	SHSP domain-containing protein OS=Solanum lycopersicum OX=4081 GN=543572 PE=3 SV=1	-4.78366	0.00054036	0.0706092	2.977	RR
A0A3Q7FVV5	Solyc03g121180.3.1	Uncharacterized protein OS=Solanum lycopersicum OX=4081 PE=3 SV=1	4.78197	0.000541852	0.0679479	-4.52273	MG
A0A3Q7IMD9	Solyc10g083970.1.1.1	S-adenosylmethionine synthase OS=Solanum lycopersicum OX=4081 GN=101245012 PE=3 SV=1	4.71335	0.000606064	-0.0402007	-2.42813	MG
E1AZA3	Solyc03g116390.3.1	Late embryogenesis abundant protein OS=Solanum lycopersicum OX=4081 GN=100750252 PE=2 SV=1	4.66187	0.000659465	-0.12179	-3.7059	MG
A0A3Q7G195	Solyc03g005770.2.1	Chlorophyll a-b binding protein, chloroplastic OS=Solanum lycopersicum OX=4081 PE=3 SV=1	4.65089	0.000671473	-0.139228	-4.3604	MG
A0A3Q7JQ28	Solyc11g071460.2.1	Uncharacterized protein OS=Solanum lycopersicum OX=4081 GN=101258035 PE=3 SV=1	-4.64198	0.000681393	-0.153403	1.8209	RR
P54153	Solyc03g111720.3.1	Peptide methionine sulfoxide reductase (Fragment) OS=Solanum lycopersicum OX=4081 GN=E4 PE=3 SV=1	-4.62319	0.000702825	-0.183339	4.70673	RR
A0A3Q7I1F3	Solyc07g008950.3.1	Methionyl-tRNA synthetase OS=Solanum lycopersicum OX=4081 PE=3 SV=1	-4.60541	0.00072375	-0.211701	1.81863	RR
A0A3Q7ILP6	Solyc10g083650.1.1.1	Glutaredoxin-dependent peroxiredoxin OS=Solanum lycopersicum OX=4081 GN=104644379 PE=3 SV=1	-4.58975	0.000742724	-0.236723	1.89217	RR
A0A3Q7ETU6	Solyc01g110410.3.1	Uncharacterized protein OS=Solanum lycopersicum OX=4081 GN=101248524 PE=3 SV=1	-4.58503	0.000748551	-0.24428	1.87497	RR
A0A3Q7GY58	Solyc06g062950.1.1.1	Uncharacterized protein OS=Solanum lycopersicum OX=4081 GN=101264734 PE=3 SV=1	4.5785	0.000756678	-0.254721	-1.7937	MG
Q9FZ05	Solyc07g009380.3.1	Xyloglucan endotransglucosylase/hydrolase OS=Solanum lycopersicum OX=4081 GN=LeXET2 PE=2 SV=1	4.57546	0.000760495	-0.259588	-3.97153	MG
A0A3Q7IMP4	Solyc10g085040.1.1.1	Uncharacterized protein OS=Solanum lycopersicum OX=4081 GN=101251239 PE=3 SV=1	-4.56152	0.000778254	-0.281911	3.41457	RR
Q2MIA4	Solyc10g047410.1.1	Photosystem II CP43 reaction center protein OS=Solanum lycopersicum OX=4081 GN=psbC PE=3 SV=1	4.52782	0.000823022	-0.336009	-3.35623	MG
A0A3Q7I9Q3	Solyc10g005670.2.1.1	4-hydroxy-4-methyl-2-oxoglutarate aldolase OS=Solanum lycopersicum OX=4081 PE=3 SV=1	-4.52558	0.000826093	-0.339611	1.78923	RR
P43282	Solyc09g008280.2.1.1	S-adenosylmethionine synthase 3 OS=Solanum lycopersicum OX=4081 GN=SAM3 PE=2 SV=1	4.48207	0.000888165	-0.409707	-3.22657	MG
A0A3Q7H0S6	Solyc06g076480.3.1	Uncharacterized protein OS=Solanum lycopersicum OX=4081 PE=4 SV=1	4.46017	0.00092124	-0.445088	-2.84153	MG
A0A3Q7HIQ5	Solyc06g006000.3.1	Uncharacterized protein OS=Solanum lycopersicum OX=4081 GN=101264428 PE=4 SV=1	4.45368	0.000931292	-0.455591	-3.91267	MG
P43280	Solyc01g101060.2.1	S-adenosylmethionine synthase 1 OS=Solanum lycopersicum OX=4081 GN=SAM1 PE=2 SV=1	4.41241	0.00099793	-0.522481	-1.71127	MG
A0A3Q7G0N6	Solyc04g015340.3.1	Carboxypeptidase OS=Solanum lycopersicum OX=4081 GN=101250880 PE=3 SV=1	-4.39981	0.00101924	-0.542937	4.8016	RR
A0A3Q7FVM6	Solyc03g118510.3.1	Protein kinase domain-containing protein OS=Solanum lycopersicum OX=4081 GN=101268851 PE=4 SV=1	4.39959	0.00101963	-0.543304	-2.88643	MG
P28032	Solyc06g059740.2.1	Alcohol dehydrogenase 2 OS=Solanum lycopersicum OX=4081 GN=ADH2 PE=2 SV=2	-4.39908	0.00102049	-0.544119	2.1635	RR
A0A3Q7IWI5	Solyc09g025210.3.1	Uncharacterized protein OS=Solanum lycopersicum OX=4081 GN=101258989 PE=3 SV=1	4.39907	0.00102052	-0.544148	-5.70473	MG
A0A3Q7HAN1	Solyc07g047800.3.1	Uncharacterized protein OS=Solanum lycopersicum OX=4081 GN=101255117 PE=4 SV=1	-4.39796	0.00102242	-0.54595	5.81547	RR
A0A3Q7IPM4	Solyc08g079830.3.1	HMA domain-containing protein OS=Solanum lycopersicum OX=4081 GN=544169 PE=4 SV=1	-4.37749	0.00105821	-0.579254	1.551	RR
A0A3Q7GCR0	Solyc03g097470.3.1	Uncharacterized protein OS=Solanum lycopersicum OX=4081 GN=101249057 PE=3 SV=1	-4.33898	0.0011291	-0.642036	3.44837	RR
A0A3Q7FQN2	Solyc02g078040.3.1	Uncharacterized protein OS=Solanum lycopersicum OX=4081 GN=101253856 PE=4 SV=1	4.28675	0.00123329	-0.727514	-4.55093	MG
A0A3Q7FPK3	Solyc03g096040.3.1	Peroxiredoxin OS=Solanum lycopersicum OX=4081 GN=101260517 PE=3 SV=1	4.25371	0.00130436	-0.781772	-4.2735	MG
A0A3Q7EL06	Solyc01g094220.3.1	Uncharacterized protein OS=Solanum lycopersicum OX=4081 PE=4 SV=1	-4.23623	0.00134366	-0.810524	1.86577	RR
A0A3Q7J4Q2	Solyc12g013580.2.1	PPIase cyclophilin-type domain-containing protein OS=Solanum lycopersicum OX=4081 PE=4 SV=1	4.2192	0.00138315	-0.838577	-3.06473	MG
Q9THX6	Solyc04g074640.2.1	Thylakoid lumenal 29 kDa protein, chloroplastic OS=Solanum lycopersicum OX=4081 GN=CLEB3J9 PE=3 SV=1	4.20326	0.00142121	-0.864873	-4.87383	MG
A0A3Q7HR44	Solyc08g076470.3.1	Glycerol-3-phosphate acyltransferase, chloroplastic OS=Solanum lycopersicum OX=4081 GN=543901 PE=3 SV=1	-4.15693	0.00153815	-0.941464	2.23003	RR
A0A3Q7FPN5	Solyc03g096550.3.1	PLAT domain-containing protein OS=Solanum lycopersicum OX=4081 PE=4 SV=1	-4.15618	0.00154012	-0.942701	4.30283	RR
Q2MI75	Solyc01g007500.2.1	Photosystem II CP47 reaction center protein OS=Solanum lycopersicum OX=4081 GN=psbB PE=3 SV=1	4.15191	0.00155141	-0.94978	-3.49237	MG
A0A3Q7F216	Solyc01g081300.3.1	SAICAR synthetase OS=Solanum lycopersicum OX=4081 PE=3 SV=1	-4.08947	0.00172664	-1.05344	3.142	RR
A0A3Q7FJI3	Solyc02g062500.3.1	Fe2OG dioxygenase domain-containing protein OS=Solanum lycopersicum OX=4081 GN=104644281 PE=3 SV=1	-4.07728	0.00176318	-1.07373	4.4329	RR
A0A3Q7HFB9	Solyc07g064160.3.1	Thiamine thiazole synthase, chloroplastic OS=Solanum lycopersicum OX=4081 GN=101257192 PE=3 SV=1	4.07408	0.0017729	-1.07905	-5.29853	MG
A0A3Q7EWZ3	Solyc02g031950.3.1	Uncharacterized protein OS=Solanum lycopersicum OX=4081 GN=101249032 PE=4 SV=1	-4.04806	0.0018541	-1.12243	2.429	RR
P93841	Solyc01g009010.2.1	4-diphosphocytidyl-2-C-methyl-D-erythritol kinase, chloroplastic/chromoplastic (Fragment) OS=Solanum lycopersicum OX=4081 GN=ISPE PE=1 SV=1	-4.02464	0.00193048	-1.16153	2.68553	RR
A0A3Q7FVT8	Solyc03g118810.1.1.1	Uncharacterized protein OS=Solanum lycopersicum OX=4081 GN=101259138 PE=4 SV=1	-4.02355	0.00193411	-1.16335	3.8622	RR
A0A3Q7FSH7	Solyc03g114340.3.1	1-deoxy-D-xylulose-5-phosphate reductoisomerase OS=Solanum lycopersicum OX=4081 GN=543682 PE=3 SV=1	4.01935	0.00194821	-1.17039	-5.1298	MG
A0A3Q7J492	Solyc12g013690.2.1	FAD_binding_3 domain-containing protein OS=Solanum lycopersicum OX=4081 GN=101247497 PE=3 SV=1	-4.00977	0.00198069	-1.1864	4.3783	RR
A0A3Q7GNM9	Solyc05g051850.3.1	Inositol-3-phosphate synthase OS=Solanum lycopersicum OX=4081 GN=543809 PE=3 SV=1	3.9839	0.00207126	-1.22971	-3.94783	MG
A0A3Q7HPI8	Solyc06g053920.3.1	Uncharacterized protein OS=Solanum lycopersicum OX=4081 GN=101257179 PE=4 SV=1	-3.97354	0.00210871	-1.24706	3.5409	RR
A0A3Q7FEY7	Solyc03g005590.2.1	Uncharacterized protein OS=Solanum lycopersicum OX=4081 PE=3 SV=1	3.93719	0.00224582	-1.30807	-5.419	MG
A0A3Q7IM00	Solyc10g083280.2.1	AB hydrolase-1 domain-containing protein OS=Solanum lycopersicum OX=4081 PE=3 SV=1	-3.9333	0.00226102	-1.3146	2.17863	RR
A0A3Q7H3C5	Solyc07g005390.3.1	Aldedh domain-containing protein OS=Solanum lycopersicum OX=4081 GN=101262732 PE=3 SV=1	3.92464	0.00229529	-1.32917	-1.74937	MG
A0A3Q7I9U4	Solyc09g092380.3.1	Adenosylhomocysteinase OS=Solanum lycopersicum OX=4081 GN=544304 PE=3 SV=1	-3.91786	0.00232248	-1.34057	2.586	RR
A0A3Q7IHS3	Solyc10g055800.2.1	Chitin-binding type-1 domain-containing protein OS=Solanum lycopersicum OX=4081 GN=101267358 PE=4 SV=1	-3.90161	0.00238901	-1.36792	3.78693	RR
D3TI69	Solyc01g081610.3.1	Beta-hexosaminidase OS=Solanum lycopersicum OX=4081 GN=100529103 PE=2 SV=1	-3.89517	0.00241592	-1.37876	3.43523	RR
A0A3Q7F7E7	Solyc02g083280.3.1	Rhodanese domain-containing protein OS=Solanum lycopersicum OX=4081 GN=101247880 PE=4 SV=1	3.89134	0.00243209	-1.38522	-2.29873	MG
A0A3Q7EIZ7	Solyc01g087970.3.1	Carboxypeptidase OS=Solanum lycopersicum OX=4081 PE=3 SV=1	-3.88102	0.00247615	-1.40261	4.6217	RR
A0A3Q7FY03	Solyc03g123830.3.1	D-3-phosphoglycerate dehydrogenase OS=Solanum lycopersicum OX=4081 GN=101266918 PE=3 SV=1	3.87825	0.00248813	-1.40728	-2.97063	MG
A0A3Q7I5R6	Solyc09g075010.3.1	CS domain-containing protein OS=Solanum lycopersicum OX=4081 GN=101249490 PE=4 SV=1	-3.87724	0.00249252	-1.40899	1.24057	RR
G8Z278	Solyc10g005890.3.1	Hop-interacting protein THI111 OS=Solanum lycopersicum OX=4081 GN=101055529 PE=2 SV=1	-3.87374	0.00250774	-1.41488	1.3794	RR
O65917	Solyc01g067750.3.1	Shikimate dehydrogenase OS=Solanum lycopersicum OX=4081 GN=543548 PE=2 SV=1	-3.8687	0.00252987	-1.42339	2.01687	RR
A0A3Q7H1V9	Solyc04g078460.3.1	Uncharacterized protein OS=Solanum lycopersicum OX=4081 GN=101245157 PE=4 SV=1	-3.8582	0.00257658	-1.4411	3.26097	RR
A0A3Q7J3H3	Solyc12g008690.2.1	M20_dimer domain-containing protein OS=Solanum lycopersicum OX=4081 PE=3 SV=1	3.85695	0.00258223	-1.44322	-2.76313	MG
A0A3Q7H7F3	Solyc07g032640.2.1	Uncharacterized protein OS=Solanum lycopersicum OX=4081 PE=3 SV=1	3.84454	0.00263872	-1.46417	-3.21973	MG
A0A3Q7I7H2	Solyc09g090150.3.1	Uncharacterized protein OS=Solanum lycopersicum OX=4081 PE=3 SV=1	3.82802	0.00271596	-1.49209	-5.5176	MG
A0A3Q7GST8	Solyc06g050590.3.1	Lipoyl-binding domain-containing protein OS=Solanum lycopersicum OX=4081 GN=101263617 PE=4 SV=1	3.80119	0.00284637	-1.53748	-1.4962	MG
A0A3Q7FWB5	Solyc03g123610.3.1	Aminotran_1_2 domain-containing protein OS=Solanum lycopersicum OX=4081 PE=4 SV=1	-3.80076	0.00284849	-1.53821	1.24563	RR
A0A3Q7HVR7	Solyc08g080410.3.1	UBX domain-containing protein OS=Solanum lycopersicum OX=4081 GN=101244402 PE=4 SV=1	-3.77267	0.00299209	-1.5858	1.94197	RR
A0A3Q7IKY6	Solyc10g081240.2.1	GrpE protein homolog OS=Solanum lycopersicum OX=4081 PE=3 SV=1	-3.77045	0.00300379	-1.58957	2.10023	RR
A0A3Q7HUR4	Solyc08g078510.3.1	GRAM domain-containing protein OS=Solanum lycopersicum OX=4081 GN=101259275 PE=3 SV=1	-3.76753	0.00301921	-1.59453	1.88357	RR
A0A3Q7HZV3	Solyc09g010630.3.1	Uncharacterized protein OS=Solanum lycopersicum OX=4081 GN=101247151 PE=3 SV=1	-3.76428	0.00303642	-1.60003	2.6767	RR
Q5QJB4	Solyc09g090330.3.1	Harpin binding protein 1 OS=Solanum lycopersicum OX=4081 GN=HrBP1 PE=2 SV=1	-3.75255	0.00309957	-1.61994	1.95007	RR
A0A3Q7H318	Solyc07g006180.3.1	Uncharacterized protein OS=Solanum lycopersicum OX=4081 PE=3 SV=1	-3.726	0.00324746	-1.66503	1.62587	RR
Q38JD4	Solyc12g010320.2.1	Temperature-induced lipocalin OS=Solanum lycopersicum OX=4081 GN=TIL PE=2 SV=1	-3.72142	0.00327369	-1.67281	2.22943	RR
A0A3Q7HCZ8	Solyc07g045440.1.1.1	Uncharacterized protein OS=Solanum lycopersicum OX=4081 GN=101260248 PE=3 SV=1	3.68144	0.00351229	-1.74084	-3.65823	MG
A0A3Q7GFL6	Solyc05g014280.3.1	SHSP domain-containing protein OS=Solanum lycopersicum OX=4081 PE=3 SV=1	-3.67985	0.0035221	-1.74354	2.48853	RR
A0A3Q7HVS8	Solyc06g073840.3.1	TPR_REGION domain-containing protein OS=Solanum lycopersicum OX=4081 GN=101264634 PE=4 SV=1	-3.66047	0.00364451	-1.77657	3.1202	RR
A0A3Q7J4M1	Solyc12g014270.2.1.1	Uncharacterized protein OS=Solanum lycopersicum OX=4081 PE=4 SV=1	3.65788	0.00366118	-1.78098	-1.7181	MG
A0A3Q7FIF3	Solyc03g062890.3.1	Superoxide dismutase [Cu-Zn] OS=Solanum lycopersicum OX=4081 GN=101264296 PE=3 SV=1	-3.64124	0.00377025	-1.80935	2.02053	RR
A0A3Q7GW64	Solyc06g053200.3.1	Probable 6-phosphogluconolactonase OS=Solanum lycopersicum OX=4081 GN=101263711 PE=3 SV=1	-3.64038	0.00377594	-1.81081	1.33977	RR
A0A3Q7F0P2	Solyc02g067080.3.1.1	UDP-glucose 6-dehydrogenase OS=Solanum lycopersicum OX=4081 PE=3 SV=1	3.635	0.00381203	-1.82001	-2.0374	MG
A0A3Q7F9P6	Solyc02g086830.3.1	PDZ domain-containing protein OS=Solanum lycopersicum OX=4081 GN=101250650 PE=3 SV=1	3.6343	0.00381673	-1.8212	-1.79057	MG
A0A3Q7I9A3	Solyc09g091460.3.1	Protein kinase domain-containing protein OS=Solanum lycopersicum OX=4081 PE=3 SV=1	-3.63292	0.00382603	-1.82355	2.09023	RR
A0A3Q7FUS2	Solyc03g119860.3.1	PPIase cyclophilin-type domain-containing protein OS=Solanum lycopersicum OX=4081 GN=101257251 PE=4 SV=1	3.61335	0.00396058	-1.85695	-2.809	MG
Q2MIC0	Solyc05g016120.1.1	Photosystem II protein D1 OS=Solanum lycopersicum OX=4081 GN=psbA PE=3 SV=1	3.60797	0.00399848	-1.86615	-3.3541	MG
A0A3Q7JGF7	Solyc10g084320.2.1.1	Uncharacterized protein OS=Solanum lycopersicum OX=4081 PE=3 SV=1	3.59293	0.00410627	-1.89185	-2.26467	MG
A0A3Q7J162	Solyc11g070050.2.1	Uncharacterized protein OS=Solanum lycopersicum OX=4081 GN=101250366 PE=4 SV=1	-3.58906	0.00413447	-1.89846	2.03483	RR
A0A3Q7J3W0	Solyc12g009060.2.1	Uncharacterized protein OS=Solanum lycopersicum OX=4081 GN=101247586 PE=4 SV=1	-3.58596	0.00415716	-1.90375	3.7447	RR
A0A3Q7GIW3	Solyc05g032850.3.1	YTH domain-containing protein OS=Solanum lycopersicum OX=4081 GN=101248578 PE=4 SV=1	-3.56134	0.00434243	-1.94586	2.31323	RR
A0A3Q7IN43	Solyc10g086580.2.1	ATPase_AAA_core domain-containing protein OS=Solanum lycopersicum OX=4081 PE=4 SV=1	3.53852	0.00452174	-1.98492	-2.32807	MG
A0A3Q7FNP5	Solyc03g111180.3.1	Uncharacterized protein OS=Solanum lycopersicum OX=4081 GN=101265910 PE=3 SV=1	-3.52397	0.00464002	-2.00985	2.18793	RR
P38416	Solyc01g099190.2.1	Linoleate 9S-lipoxygenase B OS=Solanum lycopersicum OX=4081 GN=LOX1.2 PE=2 SV=1	-3.51844	0.00468576	-2.01932	3.76093	RR
A0A3Q7IAA7	Solyc07g056420.3.1	Uncharacterized protein OS=Solanum lycopersicum OX=4081 PE=4 SV=1	-3.50458	0.00480254	-2.04308	4.37167	RR
A0A3Q7HZ41	Solyc09g009430.3.1	Uncharacterized protein OS=Solanum lycopersicum OX=4081 GN=101261060 PE=3 SV=1	-3.4863	0.0049611	-2.07442	1.49327	RR
A0A3Q7GLU0	Solyc05g050800.3.1	Uncharacterized protein OS=Solanum lycopersicum OX=4081 GN=101243998 PE=4 SV=1	3.47754	0.00503898	-2.08944	-2.7662	MG
A0A3Q7FZA2	Solyc04g007980.3.1	Fe2OG dioxygenase domain-containing protein OS=Solanum lycopersicum OX=4081 GN=101265426 PE=3 SV=1	-3.46046	0.00519454	-2.11877	2.0775	RR
A0A3Q7G7G8	Solyc04g072160.3.1	CS domain-containing protein OS=Solanum lycopersicum OX=4081 GN=544222 PE=4 SV=1	-3.45822	0.00521525	-2.1226	2.0401	RR
A0A3Q7HFK7	Solyc07g064930.3.1	GrpE protein homolog OS=Solanum lycopersicum OX=4081 GN=101265457 PE=3 SV=1	-3.45589	0.00523691	-2.1266	1.3175	RR
P05117	Solyc10g080210.2.1	Polygalacturonase-2 OS=Solanum lycopersicum OX=4081 GN=PG2 PE=1 SV=1	-3.44585	0.00533137	-2.14384	5.03143	RR
A0A3Q7J1U2	Solyc11g072380.2.1	Uncharacterized protein OS=Solanum lycopersicum OX=4081 GN=101246214 PE=4 SV=1	3.43749	0.00541137	-2.1582	-3.5314	MG
A0A3Q7JDV8	Solyc12g096520.2.1	Uncharacterized protein OS=Solanum lycopersicum OX=4081 PE=3 SV=1	-3.43442	0.00544105	-2.16347	1.50867	RR
A0A3Q7HFP0	Solyc07g054540.3.1	Lipoyl synthase, mitochondrial OS=Solanum lycopersicum OX=4081 GN=101258875 PE=3 SV=1	-3.41425	0.00564029	-2.19813	2.37683	RR
A0A3Q7FWX0	Solyc04g009960.3.1	Beta_elim_lyase domain-containing protein OS=Solanum lycopersicum OX=4081 GN=101247807 PE=3 SV=1	-3.40929	0.00569039	-2.20665	2.47497	RR
A0A3Q7J4Y3	Solyc12g015910.1.1.1	SufE domain-containing protein OS=Solanum lycopersicum OX=4081 PE=4 SV=1	-3.40415	0.00574272	-2.21547	1.3067	RR
A0A3Q7F3X8	Solyc02g078120.2.1.1	Eukaryotic translation initiation factor 3 subunit D OS=Solanum lycopersicum OX=4081 GN=101252350 PE=3 SV=1	-3.37348	0.00606586	-2.26821	1.74727	RR
A0A3Q7HC36	Solyc07g053620.3.1	J domain-containing protein OS=Solanum lycopersicum OX=4081 PE=4 SV=1	-3.36913	0.00611323	-2.2757	2.16977	RR
A0A3Q7F6N7	Solyc02g083710.3.1	VWFA domain-containing protein OS=Solanum lycopersicum OX=4081 GN=101263071 PE=3 SV=1	-3.36696	0.00613702	-2.27944	1.1405	RR
A0A3Q7GSA0	Solyc06g048540.3.1	ABC transporter domain-containing protein OS=Solanum lycopersicum OX=4081 GN=101247531 PE=4 SV=1	-3.36306	0.00617989	-2.28614	1.3557	RR
A0A3Q7JCI1	Solyc12g088220.2.1	Branched-chain-amino-acid aminotransferase OS=Solanum lycopersicum OX=4081 GN=101253875 PE=3 SV=1	-3.35359	0.00628535	-2.30243	5.05847	RR
A0A3Q7HI48	Solyc05g056490.3.1	3'(2'),5'-bisphosphate nucleotidase OS=Solanum lycopersicum OX=4081 PE=3 SV=1	-3.34278	0.00640799	-2.32103	1.35193	RR
F8WS84	Solyc02g091840.3.1	Leucine rich repeat receptor protein kinase CLAVATA1 OS=Solanum lycopersicum OX=4081 GN=SlpCLV1 PE=2 SV=1	3.33222	0.00653015	-2.3392	-3.1519	MG
A0A3Q7HBP7	Solyc07g053150.3.1	Ferroxidase OS=Solanum lycopersicum OX=4081 GN=101265146 PE=3 SV=1	-3.31525	0.00673139	-2.36841	3.5082	RR
A0A3Q7I6C0	Solyc09g082460.3.1	Hcy-binding domain-containing protein OS=Solanum lycopersicum OX=4081 GN=101251816 PE=4 SV=1	-3.31111	0.00678151	-2.37554	4.6578	RR
A0A3Q7GKK1	Solyc03g120640.3.1	Uncharacterized protein OS=Solanum lycopersicum OX=4081 GN=101264609 PE=3 SV=1	3.29674	0.00695826	-2.40029	-2.59337	MG
A0A3Q7HCP9	Solyc07g043310.3.1	Uncharacterized protein OS=Solanum lycopersicum OX=4081 GN=543873 PE=3 SV=1	-3.29602	0.00696726	-2.40153	2.71667	RR
A0A3Q7EQ88	Solyc01g103540.3.1	YTH domain-containing protein OS=Solanum lycopersicum OX=4081 GN=101267743 PE=4 SV=1	-3.29303	0.00700455	-2.40667	2.04227	RR
A0A3Q7HRB7	Solyc08g076920.3.1	Arf-GAP domain-containing protein OS=Solanum lycopersicum OX=4081 GN=101244022 PE=4 SV=1	-3.28505	0.00710549	-2.42042	1.50117	RR
A0A3Q7HWL8	Solyc09g007940.3.1	Adenosine kinase OS=Solanum lycopersicum OX=4081 GN=101244800 PE=3 SV=1	3.27874	0.00718624	-2.43128	-1.56287	MG
A0A3Q7GWV4	Solyc06g054530.3.1	Uncharacterized protein OS=Solanum lycopersicum OX=4081 PE=4 SV=1	-3.27673	0.0072122	-2.43475	2.5914	RR
A0A3Q7G024	Solyc04g014480.3.1	SHSP domain-containing protein OS=Solanum lycopersicum OX=4081 GN=101268271 PE=3 SV=1	-3.27452	0.00724071	-2.43854	1.6832	RR
A0A3Q7I009	Solyc09g011080.3.1	ATPase_AAA_core domain-containing protein OS=Solanum lycopersicum OX=4081 GN=101250725 PE=4 SV=1	3.24435	0.00764317	-2.49052	-2.87157	MG
A0A3Q7EP32	Solyc01g100760.2.1.1	Uncharacterized protein OS=Solanum lycopersicum OX=4081 GN=101254945 PE=4 SV=1	3.23399	0.00778655	-2.50837	-3.21497	MG
A0A3Q7EJP1	Solyc01g090360.3.1	Non-specific lipid-transfer protein OS=Solanum lycopersicum OX=4081 GN=101259287 PE=3 SV=1	3.2308	0.00783122	-2.51387	-3.87303	MG
A0A3Q7EDX6	Solyc01g057830.3.1	Uncharacterized protein OS=Solanum lycopersicum OX=4081 GN=101247851 PE=4 SV=1	3.21264	0.00809062	-2.54515	-1.48417	MG
Q6QLU0	Solyc07g062970.3.1	Protein phosphatase 2C OS=Solanum lycopersicum OX=4081 GN=543923 PE=2 SV=1	-3.21261	0.00809103	-2.5452	1.35883	RR
A0A3Q7F6J3	Solyc02g083460.3.1	Peptidase A1 domain-containing protein OS=Solanum lycopersicum OX=4081 GN=101268338 PE=3 SV=1	-3.21151	0.00810715	-2.54711	1.7814	RR
P17340	Solyc04g082010.1.1.1	Plastocyanin, chloroplastic OS=Solanum lycopersicum OX=4081 GN=PETE PE=2 SV=1	3.20883	0.0081462	-2.55172	-1.93343	MG
A0A3Q7J2M6	Solyc12g006975.1.1	Uncharacterized protein OS=Solanum lycopersicum OX=4081 PE=4 SV=1	-3.19093	0.00841223	-2.58256	1.5946	RR
A0A3Q7EM39	Solyc01g097190.3.1	Uncharacterized protein OS=Solanum lycopersicum OX=4081 PE=4 SV=1	-3.18447	0.00851038	-2.59369	1.03423	RR
A0A3Q7F4A6	Solyc02g079060.3.1	Eukaryotic translation initiation factor 3 subunit J OS=Solanum lycopersicum OX=4081 GN=101255357 PE=3 SV=1	-3.1712	0.00871571	-2.61656	2.2854	RR
A0A3Q7IEV2	Solyc10g038120.2.1	Coatomer subunit delta OS=Solanum lycopersicum OX=4081 PE=3 SV=1	-3.16667	0.00878708	-2.62438	1.8778	RR
K4D422	Solyc10g085880.1.1	UDP-glycosyltransferase 73C4 OS=Solanum lycopersicum OX=4081 GN=UGT73C4 PE=2 SV=1	-3.16637	0.00879179	-2.62489	4.80213	RR
A0A3Q7I850	Solyc09g091590.3.1	Alba domain-containing protein OS=Solanum lycopersicum OX=4081 GN=101258492 PE=4 SV=1	-3.16034	0.00888753	-2.63528	1.29603	RR
A0A3Q7FL70	Solyc03g063200.3.1	Uncharacterized protein OS=Solanum lycopersicum OX=4081 PE=4 SV=1	3.14885	0.00907294	-2.65507	-2.04787	MG
P27065	Solyc01g007330.2.1	Ribulose bisphosphate carboxylase large chain OS=Solanum lycopersicum OX=4081 GN=rbcL PE=1 SV=4	3.13113	0.0093667	-2.6856	-1.4419	MG
A0A3Q7IZT1	Solyc11g068460.2.1	Uncharacterized protein OS=Solanum lycopersicum OX=4081 GN=101260202 PE=4 SV=1	-3.11654	0.00961578	-2.71074	1.52247	RR
A0A3Q7GWP0	Solyc06g068010.3.1	Lipoyl-binding domain-containing protein OS=Solanum lycopersicum OX=4081 GN=101265244 PE=4 SV=1	-3.11308	0.00967584	-2.7167	1.19777	RR
A0A3Q7FGM4	Solyc03g044150.3.1	Uncharacterized protein OS=Solanum lycopersicum OX=4081 PE=3 SV=1	3.11227	0.00968992	-2.7181	-3.10787	MG
A0A3Q7GS13	Solyc06g009190.3.1	Pectinesterase OS=Solanum lycopersicum OX=4081 GN=101260941 PE=3 SV=1	3.09958	0.00991373	-2.73996	-2.9968	MG
A0A3Q7GZ60	Solyc04g071615.1.1	Uncharacterized protein OS=Solanum lycopersicum OX=4081 PE=3 SV=1	3.0929	0.0100337	-2.75147	-2.0489	MG
A0A3Q7HWE0	Solyc06g074980.3.1	Uncharacterized protein OS=Solanum lycopersicum OX=4081 GN=101266129 PE=4 SV=1	-3.09127	0.0100631	-2.75428	1.78507	RR
A0A3Q7IJU2	Solyc10g076510.2.1	Pyruvate decarboxylase OS=Solanum lycopersicum OX=4081 GN=101247173 PE=3 SV=1	-3.09084	0.010071	-2.75502	3.31973	RR
A0A3Q7GM40	Solyc06g005710.3.1	NAD(P)-bd_dom domain-containing protein OS=Solanum lycopersicum OX=4081 GN=101257969 PE=4 SV=1	3.08252	0.0102229	-2.76935	-4.0758	MG
A0A3Q7IJ83	Solyc08g062820.3.1	Cytokinin riboside 5'-monophosphate phosphoribohydrolase OS=Solanum lycopersicum OX=4081 GN=101252798 PE=3 SV=1	-3.08191	0.0102342	-2.7704	1.2684	RR
A0A3Q7G0R2	Solyc03g005020.3.1	Lipase OS=Solanum lycopersicum OX=4081 GN=101250773 PE=3 SV=1	-3.07599	0.0103437	-2.78059	2.96323	RR
A0A3Q7GB69	Solyc04g082630.3.1	Glyceraldehyde-3-phosphate dehydrogenase OS=Solanum lycopersicum OX=4081 GN=101264004 PE=3 SV=1	3.05609	0.0107211	-2.81485	-1.77037	MG
A0A3Q7FD98	Solyc01g108880.3.1	Fe2OG dioxygenase domain-containing protein OS=Solanum lycopersicum OX=4081 PE=3 SV=1	-3.05059	0.0108278	-2.82433	1.93683	RR
A0A3Q7GQA6	Solyc05g055000.3.1	Cysteine desulfurase OS=Solanum lycopersicum OX=4081 GN=101250891 PE=3 SV=1	-3.0373	0.0110902	-2.84721	2.2663	RR
A0A3Q7FLG3	Solyc02g067360.3.1	PDZ domain-containing protein OS=Solanum lycopersicum OX=4081 GN=101267480 PE=3 SV=1	3.00768	0.011698	-2.89817	-2.09187	MG
A0A3Q7EUE8	Solyc01g111060.3.1	PNP_UDP_1 domain-containing protein OS=Solanum lycopersicum OX=4081 PE=4 SV=1	-3.00472	0.0117605	-2.90326	1.4722	RR
A0A3Q7I6B9	Solyc09g082060.3.1	Cysteine synthase OS=Solanum lycopersicum OX=4081 GN=101244415 PE=3 SV=1	3.00472	0.0117606	-2.90326	-1.69543	MG
A0A3Q7FAS8	Solyc02g091900.3.1.1	Cysteine desulfurase OS=Solanum lycopersicum OX=4081 PE=3 SV=1	-3.00448	0.0117657	-2.90368	1.3	RR
A0A3Q7H1L0	Solyc06g083190.3.1	Peptidylprolyl isomerase OS=Solanum lycopersicum OX=4081 PE=4 SV=1	-3.00354	0.0117855	-2.90528	1.15077	RR
A0A3Q7FCH4	Solyc02g091680.3.1	Fn3_like domain-containing protein OS=Solanum lycopersicum OX=4081 PE=3 SV=1	3.00239	0.0118101	-2.90727	-4.27253	MG
A0A3Q7JNN2	Solyc11g065730.2.1	Uncharacterized protein OS=Solanum lycopersicum OX=4081 GN=101249521 PE=4 SV=1	-3.00099	0.0118399	-2.90968	2.52667	RR
A0A3Q7HHE9	Solyc08g006540.3.1	Peptidylprolyl isomerase OS=Solanum lycopersicum OX=4081 PE=4 SV=1	2.99544	0.0119588	-2.91922	-1.49493	MG
A0A3Q7IDI1	Solyc10g012370.3.1	Cysteine synthase OS=Solanum lycopersicum OX=4081 GN=101253940 PE=3 SV=1	-2.98602	0.0121636	-2.93542	1.47073	RR
A0A3Q7I7R7	Solyc09g082650.3.1	1,2-dihydroxy-3-keto-5-methylthiopentene dioxygenase OS=Solanum lycopersicum OX=4081 PE=3 SV=1	-2.98242	0.0122428	-2.94162	3.22577	RR
A0A3Q7ENA3	Solyc01g099190.3.1	Lipoxygenase OS=Solanum lycopersicum OX=4081 PE=3 SV=1	-2.97182	0.0124789	-2.95983	3.23183	RR
A0A3Q7HTY1	Solyc08g076990.3.1	M20_dimer domain-containing protein OS=Solanum lycopersicum OX=4081 GN=101267549 PE=4 SV=1	-2.96177	0.012707	-2.9771	1.80633	RR
A0A3Q7FTZ2	Solyc03g117440.3.1	RNA helicase OS=Solanum lycopersicum OX=4081 PE=3 SV=1	-2.956	0.0128398	-2.98701	1.90797	RR
A0A3Q7IVH1	Solyc11g039650.2.1	Dynamin GTPase OS=Solanum lycopersicum OX=4081 GN=101256548 PE=3 SV=1	-2.95554	0.0128506	-2.98782	1.58207	RR
A0A3Q7ER45	Solyc01g105280.3.1	PPM-type phosphatase domain-containing protein OS=Solanum lycopersicum OX=4081 GN=101254846 PE=4 SV=1	-2.94638	0.0130644	-3.00354	2.49943	RR
A0A3Q7GP79	Solyc06g011370.3.1	Clp R domain-containing protein OS=Solanum lycopersicum OX=4081 PE=3 SV=1	-2.91865	0.0137343	-3.05116	2.31287	RR
A0A3Q7GDJ7	Solyc05g009530.3.1	Dihydrolipoamide acetyltransferase component of pyruvate dehydrogenase complex OS=Solanum lycopersicum OX=4081 GN=101257857 PE=3 SV=1	-2.91614	0.0137965	-3.05547	2.33633	RR
A0A3Q7H5M1	Solyc06g084000.3.1	Uncharacterized protein OS=Solanum lycopersicum OX=4081 PE=4 SV=1	-2.8958	0.0143119	-3.09036	1.29117	RR
A0A3Q7H3P6	Solyc06g076020.3.1	Uncharacterized protein OS=Solanum lycopersicum OX=4081 GN=100736433 PE=3 SV=1	-2.89546	0.0143206	-3.09094	1.56503	RR
A0A3Q7HQX5	Solyc08g075100.3.1	Uncharacterized protein OS=Solanum lycopersicum OX=4081 PE=4 SV=1	-2.89058	0.0144473	-3.09932	1.30783	RR
A0A3Q7FR83	Solyc03g111830.3.1	Protein-L-isoaspartate O-methyltransferase OS=Solanum lycopersicum OX=4081 PE=3 SV=1	-2.88692	0.0145429	-3.10559	1.1439	RR
A0A3Q7EVQ8	Solyc01g111040.3.1	Uncharacterized protein OS=Solanum lycopersicum OX=4081 PE=4 SV=1	-2.87069	0.0149747	-3.1334	1.99007	RR
A0A3Q7GXU0	Solyc06g062350.3.1	RuvB-like helicase OS=Solanum lycopersicum OX=4081 PE=3 SV=1	-2.87065	0.0149759	-3.13348	1.97617	RR
A0A3Q7HXU3	Solyc09g011030.3.1	TOG domain-containing protein OS=Solanum lycopersicum OX=4081 GN=101253115 PE=4 SV=1	-2.86998	0.0149938	-3.13461	1.11607	RR
Q0ZPA3	Solyc02g081170.3.1	Plastid lipid associated protein CHRC OS=Solanum lycopersicum OX=4081 GN=ChrC PE=2 SV=1	-2.8528	0.0154655	-3.16404	2.05167	RR
A0A3Q7F153	Solyc02g069010.3.1	Inositol-1-monophosphatase OS=Solanum lycopersicum OX=4081 PE=3 SV=1	-2.84454	0.0156977	-3.17819	1.9262	RR
A0A3Q7EZ79	Solyc02g062470.2.1	Fe2OG dioxygenase domain-containing protein OS=Solanum lycopersicum OX=4081 PE=3 SV=1	-2.83565	0.0159513	-3.1934	2.58577	RR
A0A3Q7FX57	Solyc04g011440.3.1	Uncharacterized protein OS=Solanum lycopersicum OX=4081 PE=3 SV=1	-2.83528	0.0159617	-3.19402	1.68997	RR
A0A3Q7I5Y6	Solyc09g065470.3.1	Uncharacterized protein OS=Solanum lycopersicum OX=4081 PE=4 SV=1	2.82925	0.0161362	-3.20434	-6.23063	MG
A0A3Q7JTC3	Solyc12g014100.2.1	Homogentisate 1,2-dioxygenase OS=Solanum lycopersicum OX=4081 GN=543605 PE=3 SV=1	-2.82689	0.0162051	-3.20838	1.59153	RR
A0A3Q7FWE8	Solyc04g009030.3.1	Glyceraldehyde-3-phosphate dehydrogenase OS=Solanum lycopersicum OX=4081 GN=101266713 PE=3 SV=1	2.82001	0.0164073	-3.22014	-1.69363	MG
A0A3Q7GDF2	Solyc05g005865.1.1	Bet_v_1 domain-containing protein OS=Solanum lycopersicum OX=4081 PE=4 SV=1	-2.8184	0.0164549	-3.22289	1.86017	RR
A0A3Q7JFE9	Solyc12g099110.2.1	Uncharacterized protein OS=Solanum lycopersicum OX=4081 GN=101245144 PE=4 SV=1	-2.8177	0.0164759	-3.2241	1.41067	RR
A0A3Q7GV49	Solyc06g063360.3.1	Protein kinase domain-containing protein OS=Solanum lycopersicum OX=4081 PE=4 SV=1	2.81107	0.0166739	-3.23542	-4.04457	MG
A0A3Q7ISP8	Solyc09g008070.3.1	Uncharacterized protein OS=Solanum lycopersicum OX=4081 GN=101266255 PE=4 SV=1	-2.80875	0.0167439	-3.23939	2.91933	RR
A0A3Q7J882	Solyc12g037980.2.1	Uncharacterized protein OS=Solanum lycopersicum OX=4081 GN=101260909 PE=3 SV=1	-2.79987	0.0170138	-3.25455	2.4217	RR
A0A3Q7GZW2	Solyc06g073260.3.1	Epimerase domain-containing protein OS=Solanum lycopersicum OX=4081 GN=101253094 PE=4 SV=1	2.79599	0.0171332	-3.26118	-2.28957	MG
A0A3Q7HD09	Solyc07g044860.3.1	23 kDa subunit of oxygen evolving system of photosystem II OS=Solanum lycopersicum OX=4081 GN=544077 PE=3 SV=1	2.79248	0.0172419	-3.26717	-1.9848	MG
A0A3Q7EKI7	Solyc01g091190.3.1	3-phosphoshikimate 1-carboxyvinyltransferase OS=Solanum lycopersicum OX=4081 GN=543977 PE=3 SV=1	-2.78386	0.0175119	-3.28189	1.99453	RR
A0A3Q7JP06	Solyc11g066620.2.1	Peptidase A1 domain-containing protein OS=Solanum lycopersicum OX=4081 GN=101266792 PE=3 SV=1	-2.7814	0.0175899	-3.2861	2.32173	RR
A0A3Q7EYI3	Solyc02g062463.1.1	Fe2OG dioxygenase domain-containing protein OS=Solanum lycopersicum OX=4081 PE=3 SV=1	-2.7742	0.0178196	-3.29839	1.6902	RR
A0A3Q7HC76	Solyc07g053280.3.1	Acetohydroxy-acid reductoisomerase OS=Solanum lycopersicum OX=4081 PE=3 SV=1	-2.77397	0.0178267	-3.29876	1.3592	RR
A0A3Q7IAU4	Solyc10g007600.3.1	(S)-2-hydroxy-acid oxidase OS=Solanum lycopersicum OX=4081 GN=100134875 PE=3 SV=1	2.77118	0.0179168	-3.30353	-2.04727	MG
A0A3Q7EQJ0	Solyc01g005250.3.1	Aspartate-semialdehyde dehydrogenase OS=Solanum lycopersicum OX=4081 GN=101258686 PE=3 SV=1	-2.76958	0.0179685	-3.30626	1.30207	RR
A0A3Q7ILR9	Solyc10g080900.2.1	Uncharacterized protein OS=Solanum lycopersicum OX=4081 PE=4 SV=1	-2.76868	0.0179976	-3.30779	5.68083	RR
A0A3Q7I7N1	Solyc07g049440.3.1	Uncharacterized protein OS=Solanum lycopersicum OX=4081 GN=101266652 PE=3 SV=1	2.7649	0.0181204	-3.31423	-2.4079	MG
A0A3Q7FN94	Solyc03g097270.3.1	Cysteine proteinase inhibitor OS=Solanum lycopersicum OX=4081 GN=543631 PE=3 SV=1	2.76291	0.0181856	-3.31763	-1.96367	MG
A0A3Q7HHC2	Solyc05g055160.3.1	Uncharacterized protein OS=Solanum lycopersicum OX=4081 GN=101248484 PE=3 SV=1	-2.76021	0.0182745	-3.32224	1.5562	RR
A0A3Q7HPT6	Solyc08g068310.3.1	Uncharacterized protein OS=Solanum lycopersicum OX=4081 GN=101259467 PE=4 SV=1	-2.75834	0.018336	-3.32542	1.39277	RR
Q2MI87	Solyc01g007380.1.1	Cytochrome f OS=Solanum lycopersicum OX=4081 GN=petA PE=3 SV=1	2.75775	0.0183556	-3.32643	-2.19693	MG
A0A3Q7H1N1	Solyc06g076690.3.1	4HBT domain-containing protein OS=Solanum lycopersicum OX=4081 PE=3 SV=1	-2.7574	0.0183672	-3.32703	2.03577	RR
A0A3Q7H036	Solyc06g068670.3.1	ACT domain-containing protein OS=Solanum lycopersicum OX=4081 GN=101249372 PE=4 SV=1	2.75641	0.0183998	-3.32871	-2.21453	MG
A0A3Q7HQA3	Solyc08g065220.3.1	Glycine cleavage system P protein OS=Solanum lycopersicum OX=4081 GN=101260070 PE=3 SV=1	2.75638	0.0184008	-3.32876	-1.3746	MG
A0A3Q7ESV2	Solyc01g106090.3.1	23 kDa subunit of oxygen evolving system of photosystem II OS=Solanum lycopersicum OX=4081 GN=101264980 PE=3 SV=1	2.74063	0.0189305	-3.3556	-2.3973	MG
A0A3Q7HVH2	Solyc09g005740.2.1.1	TPR_REGION domain-containing protein OS=Solanum lycopersicum OX=4081 PE=4 SV=1	-2.73807	0.0190179	-3.35995	1.0804	RR
Q42884	Solyc04g049350.2.1	Chorismate synthase 1, chloroplastic OS=Solanum lycopersicum OX=4081 GN=CS1 PE=2 SV=1	-2.73772	0.01903	-3.36055	1.04107	RR
A0A3Q7ESW4	Solyc01g108630.3.1	Uncharacterized protein OS=Solanum lycopersicum OX=4081 GN=778325 PE=3 SV=1	-2.73303	0.0191915	-3.36854	1.7221	RR
A0A3Q7I0B7	Solyc09g011470.3.1	Uncharacterized protein OS=Solanum lycopersicum OX=4081 GN=101243814 PE=4 SV=1	-2.72813	0.0193616	-3.37687	2.0274	RR
A0A3Q7EHY8	Solyc01g079880.3.1	DUF3700 domain-containing protein OS=Solanum lycopersicum OX=4081 GN=101253225 PE=4 SV=1	-2.72751	0.0193829	-3.37791	1.54287	RR
A0A3Q7G5J5	Solyc04g058065.1.1	Uncharacterized protein OS=Solanum lycopersicum OX=4081 PE=4 SV=1	-2.72664	0.0194134	-3.3794	1.6816	RR
A0A3Q7JSV3	Solyc12g011040.2.1	Lipoxygenase OS=Solanum lycopersicum OX=4081 PE=3 SV=1	2.72234	0.0195644	-3.38672	-2.33743	MG
A0A3Q7ISW6	Solyc11g012160.2.1	Fumarylacetoacetase OS=Solanum lycopersicum OX=4081 GN=101254443 PE=3 SV=1	-2.71932	0.0196712	-3.39186	1.85267	RR
A0A3Q7FSS5	Solyc03g114930.3.1	23 kDa subunit of oxygen evolving system of photosystem II OS=Solanum lycopersicum OX=4081 GN=101259227 PE=3 SV=1	2.71897	0.0196834	-3.39245	-1.873	MG
A0A3Q7G7L7	Solyc04g074750.3.1	Uncharacterized protein OS=Solanum lycopersicum OX=4081 GN=101266507 PE=4 SV=1	2.71831	0.0197069	-3.39357	-2.0389	MG
A0A3Q7IYI9	Solyc11g066100.2.1	Uncharacterized protein OS=Solanum lycopersicum OX=4081 GN=101255164 PE=3 SV=1	-2.71394	0.0198624	-3.40099	2.03107	RR
A0A3Q7IN41	Solyc10g085290.2.1	Uncharacterized protein OS=Solanum lycopersicum OX=4081 PE=4 SV=1	-2.70849	0.0200583	-3.41026	1.20457	RR
A0A3Q7J1M0	Solyc12g005630.2.1	Plastoquinol--plastocyanin reductase OS=Solanum lycopersicum OX=4081 GN=101243864 PE=3 SV=1	2.70473	0.0201947	-3.41666	-2.15077	MG
A0A3Q7JEH3	Solyc12g099000.2.1	S-adenosylmethionine synthase OS=Solanum lycopersicum OX=4081 PE=3 SV=1	2.69991	0.0203707	-3.42484	-1.2713	MG
A0A3Q7G1J0	Solyc04g015040.3.1	Peptidylprolyl isomerase OS=Solanum lycopersicum OX=4081 GN=101257061 PE=4 SV=1	2.69685	0.0204829	-3.43003	-1.329	MG
A0A3Q7GDE7	Solyc05g007100.3.1	Uncharacterized protein OS=Solanum lycopersicum OX=4081 PE=3 SV=1	2.6853	0.0209133	-3.44964	-1.28543	MG
Q93YH0	Solyc01g100520.3.1	ATP-dependent Clp protease proteolytic subunit OS=Solanum lycopersicum OX=4081 GN=clpP2 PE=2 SV=1	-2.68275	0.0210093	-3.45396	2.64087	RR
A0A3Q7F7I4	Solyc01g098645.1.1	Uncharacterized protein OS=Solanum lycopersicum OX=4081 PE=3 SV=1	-2.67934	0.0211387	-3.45975	2.60437	RR
A0A3Q7GJ82	Solyc05g024415.1.1	Uncharacterized protein OS=Solanum lycopersicum OX=4081 GN=101257076 PE=4 SV=1	-2.67354	0.0213605	-3.46959	2.95777	RR
A0A3Q7GND4	Solyc05g056270.3.1	Uncharacterized protein OS=Solanum lycopersicum OX=4081 GN=101247324 PE=4 SV=1	-2.67139	0.0214433	-3.47323	1.4157	RR
A0A3Q7EI59	Solyc01g080280.3.1	Glutamine synthetase OS=Solanum lycopersicum OX=4081 GN=543998 PE=3 SV=1	2.66558	0.0216685	-3.48308	-1.57983	MG
A0A3Q7FBU5	Solyc01g106260.3.1	Uncharacterized protein OS=Solanum lycopersicum OX=4081 GN=101244620 PE=3 SV=1	-2.66509	0.0216878	-3.48392	1.0346	RR
A0A3Q7J5N2	Solyc12g014380.2.1	Glucose-6-phosphate isomerase OS=Solanum lycopersicum OX=4081 PE=3 SV=1	-2.65739	0.0219899	-3.49694	1.96827	RR
A0A3Q7HDY9	Solyc05g046310.3.1	Uncharacterized protein OS=Solanum lycopersicum OX=4081 GN=101265337 PE=4 SV=1	-2.65124	0.0222345	-3.50736	2.1799	RR
A0A3Q7FSE5	Solyc03g114150.3.1	Aldedh domain-containing protein OS=Solanum lycopersicum OX=4081 GN=101250104 PE=3 SV=1	2.63894	0.0227319	-3.52818	-1.42273	MG
A0A3Q7JPE6	Solyc11g068730.2.1	CN hydrolase domain-containing protein OS=Solanum lycopersicum OX=4081 GN=101266793 PE=3 SV=1	-2.63335	0.0229614	-3.53763	1.47213	RR
A0A3Q7HFP1	Solyc07g065120.3.1	Glycerophosphodiester phosphodiesterase OS=Solanum lycopersicum OX=4081 GN=101262834 PE=4 SV=1	-2.62808	0.0231797	-3.54653	1.15647	RR
A0A3Q7FNG4	Solyc03g098740.1.1.1	Uncharacterized protein OS=Solanum lycopersicum OX=4081 GN=101244562 PE=3 SV=1	-2.62765	0.0231977	-3.54726	2.42707	RR
A0A3Q7EGV4	Solyc01g079220.3.1	NifU domain-containing protein OS=Solanum lycopersicum OX=4081 GN=101262349 PE=3 SV=1	-2.62326	0.0233813	-3.55467	1.84873	RR
A0A3Q7FVL0	Solyc03g120670.3.1	Uncharacterized protein OS=Solanum lycopersicum OX=4081 PE=3 SV=1	-2.61344	0.0237976	-3.57126	1.9219	RR
A0A3Q7FHJ9	Solyc03g025950.3.1	Cytochrome b5 heme-binding domain-containing protein OS=Solanum lycopersicum OX=4081 PE=4 SV=1	-2.61113	0.0238966	-3.57516	1.66073	RR
A0A3Q7FMF3	Solyc03g080160.3.1	NAC-A/B domain-containing protein OS=Solanum lycopersicum OX=4081 PE=4 SV=1	-2.61083	0.0239094	-3.57566	1.59293	RR
A0A3Q7IM48	Solyc10g084410.2.1	Protein-serine/threonine phosphatase OS=Solanum lycopersicum OX=4081 PE=3 SV=1	-2.59102	0.0247753	-3.60907	1.36097	RR
A0A3Q7ICA0	Solyc10g008390.3.1	Thioredoxin domain-containing protein OS=Solanum lycopersicum OX=4081 GN=101261858 PE=4 SV=1	-2.58875	0.0248766	-3.6129	1.22467	RR
A0A3Q7H0W4	Solyc06g071000.3.1	Aldedh domain-containing protein OS=Solanum lycopersicum OX=4081 PE=3 SV=1	-2.5846	0.0250623	-3.61987	1.20863	RR
A0A3Q7J9R5	Solyc12g043120.2.1	Uncharacterized protein OS=Solanum lycopersicum OX=4081 GN=101265903 PE=4 SV=1	-2.58268	0.0251491	-3.62312	1.5779	RR
A0A3Q7FKT4	Solyc02g065470.1.1.1	SCP domain-containing protein OS=Solanum lycopersicum OX=4081 GN=101257731 PE=4 SV=1	2.57294	0.0255924	-3.6395	-2.45033	MG
A0A3Q7JAE3	Solyc12g056530.2.1	D-fructose-1,6-bisphosphate 1-phosphohydrolase OS=Solanum lycopersicum OX=4081 GN=101262700 PE=3 SV=1	-2.56953	0.0257494	-3.64524	1.95163	RR
A0A3Q7ESZ6	Solyc01g106320.2.1.1	PB1 domain-containing protein OS=Solanum lycopersicum OX=4081 GN=101252825 PE=4 SV=1	2.56632	0.025898	-3.65063	-1.2108	MG
A0A3Q7JX44	Solyc12g056830.1.1.1	Uncharacterized protein OS=Solanum lycopersicum OX=4081 GN=101254882 PE=3 SV=1	2.55794	0.0262901	-3.66471	-2.95567	MG
K4BF05	Solyc03g025320.3.1	Alcohol acyl transferase OS=Solanum lycopersicum OX=4081 GN=AAT2 PE=2 SV=1	2.55542	0.0264095	-3.66896	-3.01473	MG
A0A3Q7FX31	Solyc03g121040.3.1	TauD domain-containing protein OS=Solanum lycopersicum OX=4081 GN=101258846 PE=4 SV=1	-2.55427	0.0264638	-3.67088	1.34617	RR
P28554	Solyc03g123760.3.1	15-cis-phytoene desaturase, chloroplastic/chromoplastic OS=Solanum lycopersicum OX=4081 GN=PDS PE=1 SV=1	-2.55298	0.0265249	-3.67304	1.53567	RR
A0A3Q7HHZ5	Solyc08g007530.3.1	AT-hook motif nuclear-localized protein OS=Solanum lycopersicum OX=4081 GN=101268706 PE=4 SV=1	2.55089	0.0266248	-3.67656	-1.72803	MG
A0A3Q7FZI5	Solyc04g011510.3.1	Uncharacterized protein OS=Solanum lycopersicum OX=4081 PE=3 SV=1	2.55063	0.0266369	-3.67699	-1.16617	MG
A0A3Q7FN52	Solyc03g097070.3.1	Uncharacterized protein OS=Solanum lycopersicum OX=4081 GN=101256571 PE=3 SV=1	-2.54758	0.0267834	-3.68212	2.1063	RR
Q9M5A8	Solyc07g042250.3.1	Chaperonin 21 OS=Solanum lycopersicum OX=4081 GN=543643 PE=2 SV=1	-2.54599	0.0268594	-3.68478	1.01797	RR
A0A3Q7F479	Solyc02g078940.3.1	PKS_ER domain-containing protein OS=Solanum lycopersicum OX=4081 GN=101268548 PE=3 SV=1	-2.54044	0.0271282	-3.6941	1.4693	RR
A0A3Q7FGF8	Solyc03g007940.3.1	Uncharacterized protein OS=Solanum lycopersicum OX=4081 PE=3 SV=1	-2.53829	0.027233	-3.69771	1.473	RR
A0A3Q7GX85	Solyc06g060260.3.1	PEROXIDASE_4 domain-containing protein OS=Solanum lycopersicum OX=4081 PE=3 SV=1	-2.52469	0.0279045	-3.72049	1.05277	RR
A0A3Q7HLD0	Solyc06g034120.3.1	PKS_ER domain-containing protein OS=Solanum lycopersicum OX=4081 GN=101250123 PE=3 SV=1	2.5146	0.0284131	-3.73738	-1.16633	MG
P08196	Solyc03g031860.3.1	Phytoene synthase 1, chloroplastic OS=Solanum lycopersicum OX=4081 GN=PSY1 PE=1 SV=2	-2.51429	0.0284292	-3.73791	1.9248	RR
A0A3Q7J2K6	Solyc12g006870.2.1	Abhydrolase_2 domain-containing protein OS=Solanum lycopersicum OX=4081 GN=101243765 PE=4 SV=1	-2.51323	0.0284832	-3.73968	1.4998	RR
A0A3Q7EZJ3	Solyc02g065250.2.1	Uncharacterized protein OS=Solanum lycopersicum OX=4081 PE=4 SV=1	-2.50599	0.0288545	-3.75178	2.86587	RR
A0A3Q7G5Y8	Solyc03g044155.1.1.1	fn3_6 domain-containing protein OS=Solanum lycopersicum OX=4081 PE=4 SV=1	2.50553	0.0288782	-3.75255	-2.50493	MG
A0A3Q7HYS2	Solyc09g015020.1.1.1	SHSP domain-containing protein OS=Solanum lycopersicum OX=4081 PE=3 SV=1	-2.50487	0.0289123	-3.75365	2.2779	RR
A0A3Q7F842	Solyc02g082270.3.1	RRM domain-containing protein OS=Solanum lycopersicum OX=4081 PE=4 SV=1	-2.50474	0.0289195	-3.75388	1.4922	RR
Q645M9	Solyc01g106480.3.1	Malate dehydrogenase OS=Solanum lycopersicum OX=4081 GN=gMDH PE=2 SV=1	2.50413	0.0289508	-3.75489	-1.89087	MG
Q7M222	Solyc11g020960.2.1	Probable proteinase inhibitor OS=Solanum lycopersicum OX=4081 GN=101255652 PE=3 SV=1	-2.50078	0.029125	-3.76049	1.321	RR
A0A3Q7IT51	Solyc09g008920.3.1	Uncharacterized protein OS=Solanum lycopersicum OX=4081 GN=101246371 PE=3 SV=1	-2.49558	0.0293971	-3.76918	1.78857	RR
A0A3Q7HP88	Solyc08g067810.3.1	CUE domain-containing protein OS=Solanum lycopersicum OX=4081 GN=101252511 PE=4 SV=1	-2.49227	0.0295719	-3.77471	1.3977	RR
A0A3Q7FBY4	Solyc01g106430.3.1	Inorganic diphosphatase OS=Solanum lycopersicum OX=4081 GN=101253833 PE=3 SV=1	2.48955	0.0297159	-3.77924	-1.08457	MG
A0A3Q7E8I1	Solyc01g005560.3.1	Isocitrate dehydrogenase [NADP] OS=Solanum lycopersicum OX=4081 GN=101268602 PE=3 SV=1	-2.48423	0.0300001	-3.78813	3.7071	RR
A0A3Q7H3B4	Solyc07g006650.3.1	Xylose isomerase OS=Solanum lycopersicum OX=4081 PE=3 SV=1	-2.4842	0.0300017	-3.78817	1.60237	RR
A0A3Q7HLK8	Solyc08g014340.3.1	Cysteine synthase OS=Solanum lycopersicum OX=4081 GN=101254617 PE=3 SV=1	2.48168	0.0301369	-3.79237	-1.1778	MG
A0A3Q7IHL0	Solyc08g041890.3.1	Importin subunit alpha OS=Solanum lycopersicum OX=4081 PE=3 SV=1	-2.46948	0.0308012	-3.8127	1.93453	RR
K4BXV0	Solyc05g012270.3.1	Citrulline--aspartate ligase OS=Solanum lycopersicum OX=4081 GN=ASS PE=2 SV=1	-2.4692	0.0308166	-3.81316	1.38483	RR
A0A3Q7EKG5	Solyc01g090170.3.1	Fe2OG dioxygenase domain-containing protein OS=Solanum lycopersicum OX=4081 PE=3 SV=1	-2.46836	0.030863	-3.81456	1.7529	RR
A0A3Q7ELK6	Solyc01g094010.3.1	Abhydrolase_3 domain-containing protein OS=Solanum lycopersicum OX=4081 GN=101244417 PE=4 SV=1	2.4667	0.0309551	-3.81734	-2.4056	MG
A0A3Q7FS03	Solyc03g117630.1.1.1	Uncharacterized protein OS=Solanum lycopersicum OX=4081 GN=101255185 PE=3 SV=1	-2.46382	0.0311147	-3.82213	2.6791	RR
A0A3Q7J3Y4	Solyc12g010180.2.1	Glutamine amidotransferase type-1 domain-containing protein OS=Solanum lycopersicum OX=4081 GN=101244841 PE=4 SV=1	-2.45809	0.0314349	-3.83167	1.36937	RR
A0A3Q7IMV7	Solyc10g083720.2.1	Pyruvate kinase OS=Solanum lycopersicum OX=4081 PE=3 SV=1	-2.45521	0.0315968	-3.83646	2.67347	RR
A0A3Q7I933	Solyc09g098120.3.1	Uncharacterized protein OS=Solanum lycopersicum OX=4081 GN=101262752 PE=3 SV=1	2.45254	0.0317476	-3.84089	-3.1751	MG
A0A3Q7I7U0	Solyc09g082780.3.1	DUF3700 domain-containing protein OS=Solanum lycopersicum OX=4081 GN=101258898 PE=4 SV=1	2.45087	0.0318424	-3.84366	-1.04107	MG
A0A3Q7IUI9	Solyc11g028100.2.1	Uncharacterized protein OS=Solanum lycopersicum OX=4081 GN=101249702 PE=4 SV=1	2.45031	0.0318746	-3.8446	-1.29713	MG
A0A3Q7ENN1	Solyc01g100380.3.1	Calreticulin OS=Solanum lycopersicum OX=4081 PE=3 SV=1	-2.44195	0.0323535	-3.85848	2.11933	RR
A0A3Q7FAX1	Solyc02g087780.3.1	Cysteine dioxygenase OS=Solanum lycopersicum OX=4081 PE=3 SV=1	2.43867	0.0325432	-3.86392	-1.19347	MG
A0A3Q7HVV0	Solyc08g080650.2.1	Uncharacterized protein OS=Solanum lycopersicum OX=4081 PE=4 SV=1	-2.4364	0.0326756	-3.8677	2.98067	RR
A0A3Q7I756	Solyc07g045350.3.1	Uncharacterized protein OS=Solanum lycopersicum OX=4081 PE=3 SV=1	2.43486	0.0327653	-3.87025	-1.0983	MG
P93213	Solyc12g010860.2.1	14-3-3 protein 8 OS=Solanum lycopersicum OX=4081 GN=TFT8 PE=2 SV=2	2.43318	0.032864	-3.87305	-1.14343	MG
A0A3Q7ELD7	Solyc01g095410.3.1	Eukaryotic translation initiation factor 4C OS=Solanum lycopersicum OX=4081 GN=101248917 PE=3 SV=1	-2.42613	0.0332794	-3.88472	1.26523	RR
K4ATQ3	Solyc01g010590.2.1	Peptidyl-prolyl cis-trans isomerase OS=Solanum lycopersicum OX=4081 GN=101253307 PE=3 SV=1	2.4113	0.0341711	-3.90929	-1.5035	MG
A0A3Q7GRY3	Solyc06g051200.3.1	Uncharacterized protein OS=Solanum lycopersicum OX=4081 GN=101247532 PE=3 SV=1	2.41108	0.0341846	-3.90966	-1.6202	MG
A0A3Q7ELN5	Solyc01g096270.3.1	Cytochrome b5 heme-binding domain-containing protein OS=Solanum lycopersicum OX=4081 PE=3 SV=1	-2.40713	0.034426	-3.91619	1.46007	RR
A0A3Q7FDP7	Solyc02g093365.1.1	Uncharacterized protein OS=Solanum lycopersicum OX=4081 PE=4 SV=1	-2.40687	0.034442	-3.91662	2.74367	RR
A0A3Q7I6S0	Solyc09g072900.3.1	DLH domain-containing protein OS=Solanum lycopersicum OX=4081 PE=4 SV=1	2.39811	0.0349831	-3.93108	-1.52007	MG
A0A3Q7EPW1	Solyc01g099770.3.1	TCTP domain-containing protein OS=Solanum lycopersicum OX=4081 GN=543941 PE=3 SV=1	-2.39413	0.0352319	-3.93766	2.03233	RR
A0A3Q7EZP5	Solyc02g065280.3.1	AB hydrolase-1 domain-containing protein OS=Solanum lycopersicum OX=4081 GN=101260990 PE=4 SV=1	-2.39172	0.0353837	-3.94165	2.01267	RR
A0A3Q7F1D2	Solyc01g080220.3.1	DLH domain-containing protein OS=Solanum lycopersicum OX=4081 GN=101261451 PE=4 SV=1	-2.3894	0.03553	-3.94547	1.7677	RR
A0A3Q7F6X3	Solyc01g097450.3.1	PITH domain-containing protein OS=Solanum lycopersicum OX=4081 GN=101263466 PE=4 SV=1	-2.38677	0.0356965	-3.94981	1.2913	RR
A0A3Q7F190	Solyc02g068150.3.1	NTF2 domain-containing protein OS=Solanum lycopersicum OX=4081 PE=4 SV=1	-2.38537	0.0357858	-3.95212	1.1944	RR
A0A3Q7JEW7	Solyc10g079090.2.1	J domain-containing protein OS=Solanum lycopersicum OX=4081 PE=4 SV=1	-2.3731	0.0365753	-3.97234	2.75703	RR
A0A3Q7F3P7	Solyc02g077670.3.1	J domain-containing protein OS=Solanum lycopersicum OX=4081 GN=101262478 PE=4 SV=1	-2.36496	0.0371082	-3.98573	1.74647	RR
A0A3Q7FPN1	Solyc03g111690.3.1	Pectate lyase OS=Solanum lycopersicum OX=4081 PE=3 SV=1	-2.35935	0.0374804	-3.99497	2.5861	RR
A0A3Q7GIA3	Solyc03g117790.2.1	Uncharacterized protein OS=Solanum lycopersicum OX=4081 PE=4 SV=1	-2.35729	0.0376176	-3.99835	1.34247	RR
A0A3Q7EZE0	Solyc02g036330.3.1	AAA domain-containing protein OS=Solanum lycopersicum OX=4081 PE=3 SV=1	-2.35611	0.0376967	-4.0003	1.58137	RR
A0A3Q7JD76	Solyc12g094640.2.1	Glyceraldehyde-3-phosphate dehydrogenase OS=Solanum lycopersicum OX=4081 GN=101249445 PE=3 SV=1	2.35593	0.0377088	-4.00059	-2.70997	MG
A0A3Q7I5A7	Solyc09g065180.3.1	Epimerase domain-containing protein OS=Solanum lycopersicum OX=4081 GN=544217 PE=4 SV=1	2.35356	0.0378679	-4.00449	-1.22283	MG
A0A3Q7EJ55	Solyc01g087730.3.1	Ribosomal protein OS=Solanum lycopersicum OX=4081 GN=101256124 PE=3 SV=1	2.34276	0.0386007	-4.02221	-2.28317	MG
A0A3Q7EJ92	Solyc01g088480.3.1	UMP-CMP kinase OS=Solanum lycopersicum OX=4081 GN=101243930 PE=3 SV=1	2.34264	0.0386092	-4.02241	-1.2557	MG
A0A3Q7HJP5	Solyc06g008740.3.1	Uncharacterized protein OS=Solanum lycopersicum OX=4081 GN=101250699 PE=4 SV=1	2.33602	0.0390648	-4.03325	-2.26943	MG
A0A3Q7HQB6	Solyc08g074940.3.1	Uncharacterized protein OS=Solanum lycopersicum OX=4081 PE=3 SV=1	2.33413	0.0391965	-4.03636	-2.56467	MG
Q2MI59	Solyc01g007630.2.1	50S ribosomal protein L2, chloroplastic OS=Solanum lycopersicum OX=4081 GN=rpl2-A PE=3 SV=1	2.32504	0.0398332	-4.05123	-1.47087	MG
A0A3Q7E9H0	Solyc01g007740.3.1	Thioredoxin-dependent peroxiredoxin OS=Solanum lycopersicum OX=4081 GN=101256114 PE=4 SV=1	-2.30769	0.0410772	-4.0796	1.09883	RR
A0A3Q7IUF1	Solyc09g011300.3.1	UMP pyrophosphorylase OS=Solanum lycopersicum OX=4081 GN=101256028 PE=3 SV=1	2.29774	0.0418066	-4.09582	-1.1153	MG
A0A3Q7IL99	Solyc10g081310.2.1	HIT domain-containing protein OS=Solanum lycopersicum OX=4081 PE=4 SV=1	2.2955	0.041973	-4.09948	-2.09873	MG
A0A3Q7EWB6	Solyc02g021420.3.1	HP domain-containing protein OS=Solanum lycopersicum OX=4081 GN=101259383 PE=3 SV=1	2.29548	0.0419743	-4.09951	-1.38677	MG
A0A3Q7J671	Solyc12g018990.2.1	IU_nuc_hydro domain-containing protein OS=Solanum lycopersicum OX=4081 GN=101262693 PE=3 SV=1	-2.27761	0.0433217	-4.12858	1.8949	RR
A0A3Q7EN15	Solyc01g099160.3.1	Lipoxygenase OS=Solanum lycopersicum OX=4081 PE=3 SV=1	-2.27165	0.0437806	-4.13827	2.5661	RR
A0A3Q7ILY9	Solyc10g083640.2.1	Uncharacterized protein OS=Solanum lycopersicum OX=4081 GN=101263952 PE=4 SV=1	-2.26635	0.0441922	-4.14687	1.7582	RR
A0A3Q7I3V5	Solyc09g064940.3.1	R3H-assoc domain-containing protein OS=Solanum lycopersicum OX=4081 PE=4 SV=1	-2.25978	0.0447079	-4.15753	2.31653	RR
A0A3Q7H112	Solyc06g082090.3.1	Peptidase_M24 domain-containing protein OS=Solanum lycopersicum OX=4081 PE=3 SV=1	2.25279	0.0452622	-4.16884	-1.2725	MG
A0A3Q7FCE4	Solyc02g091560.3.1	Serine hydroxymethyltransferase OS=Solanum lycopersicum OX=4081 GN=101254439 PE=3 SV=1	2.24654	0.045764	-4.17896	-1.62703	MG
A0A3Q7HVA4	Solyc08g079470.3.1	Uncharacterized protein OS=Solanum lycopersicum OX=4081 GN=101265463 PE=4 SV=1	-2.23946	0.046339	-4.19041	2.99437	RR
A0A3Q7ILF6	Solyc08g069030.3.1	Delta-aminolevulinic acid dehydratase OS=Solanum lycopersicum OX=4081 PE=3 SV=1	-2.23799	0.0464589	-4.19278	2.83383	RR
A0A3Q7IGH0	Solyc10g051340.2.1	Adenylyl cyclase-associated protein OS=Solanum lycopersicum OX=4081 GN=101267359 PE=3 SV=1	-2.23083	0.0470487	-4.20434	1.02627	RR
P54928	Solyc11g012410.2.1	Inositol monophosphatase 3 OS=Solanum lycopersicum OX=4081 GN=IMP3 PE=1 SV=1	-2.22505	0.0475299	-4.21366	2.02733	RR
P05119	Solyc03g020060.3.1	Wound-induced proteinase inhibitor 2 OS=Solanum lycopersicum OX=4081 PE=1 SV=1	2.2009	0.0495917	-4.25251	-1.14093	MG
A0A3Q7E6Y7	Solyc00g007270.3.1	Eukaryotic translation initiation factor 6 OS=Solanum lycopersicum OX=4081 GN=EIF6 PE=3 SV=1	-2.19865	0.0497879	-4.25612	2.9461	RR
A0A3Q7E9J6	Solyc01g009420.3.1	Epimerase domain-containing protein OS=Solanum lycopersicum OX=4081 GN=101247451 PE=4 SV=1	-2.19701	0.0499318	-4.25876	1.246	RR
A0A3Q7ISA3	Solyc11g012900.2.1	TPR_REGION domain-containing protein OS=Solanum lycopersicum OX=4081 PE=4 SV=1	-2.19687	0.049944	-4.25898	1.51657	RR

## Sheet: TableS5
Table S5. Differentially expressed proteins (DEPs) between mature green (MG) and red ripe (RR) in NIL115. The empirical Bayes analysis pipeline of Bioconductor limma package was used to obtain the DEPs by comparing RR - MG. A p-value < 0.05 and |log2 FoldChange| ≥ 1 were set to determine significantly increased abundant proteins in MG or RR stages.
Accession	Solyc	Description	t_statistic	P_Value	B(Bayes)	log2FoldChange	increased_abundance
A0A3Q7H4U8	Solyc07g009333.1.1	Uncharacterized protein OS=Solanum lycopersicum OX=4081 PE=4 SV=1	-8.50724	3.50855e-06	-1.07928	-3.81983	MG
A0A3Q7JAN2	Solyc12g055720.2.1	Protein kinase domain-containing protein OS=Solanum lycopersicum OX=4081 GN=101251660 PE=4 SV=1	-4.1012	0.00173864	-2.56021	-4.14683	MG
A0A3Q7F2I5	Solyc01g086920.3.1.1	LRRNT_2 domain-containing protein OS=Solanum lycopersicum OX=4081 PE=3 SV=1	-3.99741	0.00207602	-2.62121	-5.91967	MG
A0A3Q7HNC6	Solyc06g050770.3.1	TPR_REGION domain-containing protein OS=Solanum lycopersicum OX=4081 GN=101266422 PE=3 SV=1	3.89225	0.00248782	-2.6846	4.49473	RR
A0A3Q7EZ95	Solyc02g063490.3.1	Malate dehydrogenase OS=Solanum lycopersicum OX=4081 GN=101249428 PE=3 SV=1	3.84906	0.00268072	-2.7111	3.63817	RR
A0A3Q7JGF7	Solyc10g084320.2.1.1	Uncharacterized protein OS=Solanum lycopersicum OX=4081 PE=3 SV=1	3.63826	0.00387036	-2.84426	3.3542	RR
A0A3Q7G4N1	Solyc03g032000.3.1	Thioredoxin reductase OS=Solanum lycopersicum OX=4081 GN=101260797 PE=3 SV=1	-3.60915	0.00407303	-2.86314	-1.55953	MG
A0A3Q7FGM4	Solyc03g044150.3.1	Uncharacterized protein OS=Solanum lycopersicum OX=4081 PE=3 SV=1	-3.57467	0.00432743	-2.88566	-4.86653	MG
A0A3Q7HFB9	Solyc07g064160.3.1	Thiamine thiazole synthase, chloroplastic OS=Solanum lycopersicum OX=4081 GN=101257192 PE=3 SV=1	-3.52653	0.00471009	-2.91737	-3.6003	MG
A0A3Q7GLI0	Solyc05g052470.3.1	Ferritin OS=Solanum lycopersicum OX=4081 GN=101260346 PE=3 SV=1	3.48306	0.00508547	-2.94628	2.96773	RR
A0A3Q7H040	Solyc06g074870.2.1	Uncharacterized protein OS=Solanum lycopersicum OX=4081 PE=4 SV=1	-3.38875	0.00600907	-3.00988	-2.48733	MG
A0A3Q7HG43	Solyc07g055290.3.1	Uncharacterized protein OS=Solanum lycopersicum OX=4081 GN=543749 PE=4 SV=1	3.3298	0.00667195	-3.05024	3.56417	RR
A0A3Q7J5H8	Solyc10g005960.1.1.1	Uncharacterized protein OS=Solanum lycopersicum OX=4081 GN=101265484 PE=3 SV=1	3.31424	0.00685897	-3.06096	1.90477	RR
A0A3Q7JDN9	Solyc12g099440.2.1	3-hydroxyacyl-CoA dehydrogenase OS=Solanum lycopersicum OX=4081 PE=3 SV=1	3.24543	0.0077526	-3.10876	2.35927	RR
A0A3Q7GSY1	Solyc06g009530.3.1	Uncharacterized protein OS=Solanum lycopersicum OX=4081 PE=3 SV=1	-3.16449	0.00895685	-3.16574	-1.58983	MG
A0A3Q7HU53	Solyc08g077300.3.1	UMP-CMP kinase OS=Solanum lycopersicum OX=4081 GN=101259471 PE=3 SV=1	3.15508	0.00910866	-3.17242	4.09293	RR
A0A3Q7INR1	Solyc10g085030.1.1.1	Uncharacterized protein OS=Solanum lycopersicum OX=4081 GN=101250355 PE=3 SV=1	3.14233	0.00931855	-3.18148	2.13813	RR
A0A3Q7G3R4	Solyc03g025720.3.1	4-coumarate--CoA ligase OS=Solanum lycopersicum OX=4081 GN=101251259 PE=4 SV=1	3.11554	0.00977548	-3.20058	5.95347	RR
A0ZXL1	Solyc02g087970.1.1.1	Mini zinc finger protein OS=Solanum lycopersicum OX=4081 GN=ima PE=2 SV=1	-3.08813	0.0102667	-3.22021	-3.0634	MG
A0A3Q7IN91	Solyc10g086190.2.1	Adenosine kinase OS=Solanum lycopersicum OX=4081 PE=3 SV=1	-3.08114	0.0103958	-3.22523	-1.92943	MG
A0A3Q7H2N0	Solyc06g074070.3.1	Protein kinase domain-containing protein OS=Solanum lycopersicum OX=4081 GN=101256887 PE=3 SV=1	-3.05691	0.0108564	-3.24267	-4.6635	MG
A0A3Q7I626	Solyc09g075950.1.1.1	Uncharacterized protein OS=Solanum lycopersicum OX=4081 GN=101255240 PE=3 SV=1	3.0427	0.0111362	-3.25293	5.1173	RR
A0A3Q7HI60	Solyc05g056540.3.1	ADH_zinc_N domain-containing protein OS=Solanum lycopersicum OX=4081 PE=4 SV=1	-3.00886	0.0118317	-3.27744	-2.59933	MG
A0A3Q7EI59	Solyc01g080280.3.1	Glutamine synthetase OS=Solanum lycopersicum OX=4081 GN=543998 PE=3 SV=1	-3.00523	0.0119089	-3.28008	-2.09373	MG
A0A3Q7HAN1	Solyc07g047800.3.1	Uncharacterized protein OS=Solanum lycopersicum OX=4081 GN=101255117 PE=4 SV=1	2.98526	0.0123427	-3.29462	2.76973	RR
A0A3Q7JCM7	Solyc10g054910.1.1.1	Peptidyl-prolyl cis-trans isomerase OS=Solanum lycopersicum OX=4081 GN=101254541 PE=3 SV=1	-2.95715	0.0129801	-3.31514	-3.13963	MG
A0A3Q7I4X2	Solyc09g061440.3.1	Uncharacterized protein OS=Solanum lycopersicum OX=4081 PE=4 SV=1	2.95683	0.0129878	-3.31538	2.0513	RR
A0A3Q7INC3	Solyc10g085830.2.1	Methyltransf_2 domain-containing protein OS=Solanum lycopersicum OX=4081 GN=101260288 PE=3 SV=1	2.94146	0.0133505	-3.32663	5.04503	RR
Q9ZS44	Solyc01g087820.2.1.1	SBT4B protein OS=Solanum lycopersicum OX=4081 GN=sbt4b PE=3 SV=1	2.93756	0.013444	-3.32949	2.7178	RR
A0A3Q7EMN1	Solyc01g097880.3.1	CMP/dCMP-type deaminase domain-containing protein OS=Solanum lycopersicum OX=4081 PE=4 SV=1	2.93543	0.0134956	-3.33106	1.78447	RR
A0A3Q7H1D8	Solyc06g072040.1.1.1	CBFD_NFYB_HMF domain-containing protein OS=Solanum lycopersicum OX=4081 PE=4 SV=1	2.91721	0.0139435	-3.34444	1.3677	RR
A0A3Q7I9A3	Solyc09g091460.3.1	Protein kinase domain-containing protein OS=Solanum lycopersicum OX=4081 PE=3 SV=1	2.91048	0.0141128	-3.3494	1.8937	RR
A0A3Q7GFD0	Solyc05g014000.3.1	Pectate lyase OS=Solanum lycopersicum OX=4081 GN=101252082 PE=3 SV=1	-2.90362	0.0142874	-3.35445	-2.27853	MG
Q05540	Solyc02g082930.3.1	Acidic 27 kDa endochitinase OS=Solanum lycopersicum OX=4081 GN=CHI17 PE=1 SV=1	2.89616	0.0144796	-3.35995	4.14497	RR
A0A3Q7FNG4	Solyc03g098740.1.1.1	Uncharacterized protein OS=Solanum lycopersicum OX=4081 GN=101244562 PE=3 SV=1	2.86463	0.0153217	-3.38325	4.71093	RR
A0A3Q7HIX0	Solyc08g014130.3.1	2-isopropylmalate synthase OS=Solanum lycopersicum OX=4081 PE=3 SV=1	2.8362	0.0161228	-3.40434	3.72153	RR
A0A3Q7INM8	Solyc11g005150.2.1	Uncharacterized protein OS=Solanum lycopersicum OX=4081 PE=4 SV=1	2.81079	0.016874	-3.42325	2.45497	RR
A0A3Q7HYF9	Solyc09g011130.2.1	Uncharacterized protein OS=Solanum lycopersicum OX=4081 PE=3 SV=1	-2.79276	0.0174283	-3.4367	-2.69553	MG
P10967	Solyc09g089580.2.1	1-aminocyclopropane-1-carboxylate oxidase homolog OS=Solanum lycopersicum OX=4081 GN=ACO3 PE=2 SV=1	2.77347	0.0180414	-3.45113	5.00127	RR
A0A3Q7IJ63	Solyc10g077030.2.1	Proteasome subunit alpha type OS=Solanum lycopersicum OX=4081 GN=101256141 PE=3 SV=1	2.71306	0.0201035	-3.49648	2.67873	RR
A0A3Q7EDH1	Solyc01g028900.3.1	Transket_pyr domain-containing protein OS=Solanum lycopersicum OX=4081 GN=101254327 PE=4 SV=1	2.70828	0.0202761	-3.50007	3.72067	RR
A0A3Q7GRY3	Solyc06g051200.3.1	Uncharacterized protein OS=Solanum lycopersicum OX=4081 GN=101247532 PE=3 SV=1	-2.7076	0.0203008	-3.50059	-3.73793	MG
A0A3Q7HLU6	Solyc06g036110.1.1.1	C2 domain-containing protein OS=Solanum lycopersicum OX=4081 GN=101263030 PE=4 SV=1	2.69986	0.0205843	-3.50643	2.3761	RR
A0A3Q7FC57	Solyc02g094150.3.1	YrdC-like domain-containing protein OS=Solanum lycopersicum OX=4081 PE=3 SV=1	2.68196	0.0212545	-3.51993	2.39627	RR
A0A3Q7HFD1	Solyc07g064240.3.1	Phytocyanin domain-containing protein OS=Solanum lycopersicum OX=4081 PE=4 SV=1	2.64734	0.0226125	-3.54611	4.1462	RR
A0A3Q7FZ14	Solyc04g009770.3.1	Uncharacterized protein OS=Solanum lycopersicum OX=4081 GN=101252869 PE=3 SV=1	2.6434	0.0227727	-3.5491	1.55837	RR
A0A3Q7IAC1	Solyc07g056540.3.1	(S)-2-hydroxy-acid oxidase OS=Solanum lycopersicum OX=4081 PE=3 SV=1	2.63604	0.0230744	-3.55468	1.7251	RR
A0A3Q7I2E5	Solyc09g031650.3.1	RING-type domain-containing protein OS=Solanum lycopersicum OX=4081 GN=101249008 PE=4 SV=1	-2.61916	0.0237811	-3.56748	-1.71653	MG
A0A3Q7ITP5	Solyc11g020330.1.1.1	SHSP domain-containing protein OS=Solanum lycopersicum OX=4081 GN=544205 PE=3 SV=1	2.61307	0.0240416	-3.57211	2.74497	RR
A0A3Q7FEG3	Solyc03g020060.3.1	Uncharacterized protein OS=Solanum lycopersicum OX=4081 GN=104646135 PE=3 SV=1	-2.61191	0.0240912	-3.57298	-2.5944	MG
A0A3Q7FRK8	Solyc03g112660.3.1	Uncharacterized protein OS=Solanum lycopersicum OX=4081 PE=4 SV=1	-2.60367	0.0244487	-3.57925	-1.34097	MG
A0A3Q7F171	Solyc02g069080.3.1	Pept_C1 domain-containing protein OS=Solanum lycopersicum OX=4081 PE=3 SV=1	2.59175	0.0249751	-3.58831	2.0524	RR
A0A3Q7E7T6	Solyc01g006160.3.1	Uncharacterized protein OS=Solanum lycopersicum OX=4081 PE=3 SV=1	-2.57644	0.025667	-3.59996	-1.58847	MG
A0A3Q7HSK0	Solyc08g074390.3.1	Glucan endo-1,3-beta-D-glucosidase OS=Solanum lycopersicum OX=4081 GN=101246556 PE=3 SV=1	2.57437	0.0257619	-3.60154	1.18357	RR
A0A3Q7FVS7	Solyc03g121640.3.1	Uncharacterized protein OS=Solanum lycopersicum OX=4081 GN=101265626 PE=3 SV=1	2.55584	0.0266281	-3.61566	1.3431	RR
Q9LEG3	Solyc01g073640.3.1	Putative alcohol dehydrogenase OS=Solanum lycopersicum OX=4081 GN=yfe37 PE=2 SV=1	-2.554	0.026716	-3.61707	-2.36987	MG
Q4VUC5	Solyc02g079930.3.1	Phosphosulfolactate synthase-related protein OS=Solanum lycopersicum OX=4081 GN=PSR PE=2 SV=1	2.55345	0.0267422	-3.61748	1.45087	RR
A0A3Q7GLT1	Solyc05g053100.3.1	Uncharacterized protein OS=Solanum lycopersicum OX=4081 GN=101246429 PE=3 SV=1	-2.54629	0.0270858	-3.62294	-2.7314	MG
Q84XK9	Solyc05g053850.3.1	SP5G OS=Solanum lycopersicum OX=4081 GN=SP5G PE=3 SV=1	-2.54465	0.0271649	-3.62419	-2.08687	MG
A0A3Q7EK89	Solyc01g091260.3.1	Uncharacterized protein OS=Solanum lycopersicum OX=4081 PE=3 SV=1	2.54079	0.0273526	-3.62714	2.16127	RR
A0A3Q7J4Q6	Solyc12g010960.2.1	Uncharacterized protein OS=Solanum lycopersicum OX=4081 PE=4 SV=1	2.53966	0.027408	-3.628	2.31067	RR
A0A3Q7GUA9	Solyc06g054490.3.1	Procollagen-proline 4-dioxygenase OS=Solanum lycopersicum OX=4081 PE=3 SV=1	-2.52239	0.0282646	-3.64119	-1.25733	MG
A0A3Q7G067	Solyc04g040180.3.1	Methyltransf_11 domain-containing protein OS=Solanum lycopersicum OX=4081 GN=101256176 PE=4 SV=1	2.51382	0.0286997	-3.64774	3.01277	RR
A0A3Q7ISE3	Solyc11g011250.2.1	Uncharacterized protein OS=Solanum lycopersicum OX=4081 PE=3 SV=1	-2.4997	0.0294308	-3.65854	-1.6428	MG
A0A3Q7H0J7	Solyc06g069390.3.1	Uncharacterized protein OS=Solanum lycopersicum OX=4081 PE=4 SV=1	-2.48808	0.0300459	-3.66743	-1.9322	MG
A0A3Q7HR46	Solyc08g066850.3.1	Lactoylglutathione lyase OS=Solanum lycopersicum OX=4081 GN=101259466 PE=3 SV=1	2.48778	0.030062	-3.66766	2.37743	RR
A0A3Q7F4C1	Solyc01g091070.3.1	Methionine aminopeptidase OS=Solanum lycopersicum OX=4081 PE=3 SV=1	-2.48104	0.0304248	-3.67282	-1.94987	MG
A0A3Q7HCZ8	Solyc07g045440.1.1.1	Uncharacterized protein OS=Solanum lycopersicum OX=4081 GN=101260248 PE=3 SV=1	-2.46772	0.0311541	-3.68302	-3.41453	MG
A0A3Q7J2E4	Solyc09g082860.3.1	Sulfate adenylyltransferase OS=Solanum lycopersicum OX=4081 PE=4 SV=1	2.4671	0.0311883	-3.68349	2.22023	RR
A0A3Q7IIT3	Solyc10g075160.1.1.1	Ferredoxin OS=Solanum lycopersicum OX=4081 GN=101265784 PE=3 SV=1	-2.46574	0.0312641	-3.68454	-2.43257	MG
A0A3Q7J5Z2	Solyc10g006990.3.1	PAP-associated domain-containing protein OS=Solanum lycopersicum OX=4081 PE=3 SV=1	-2.46174	0.0314872	-3.68761	-1.4414	MG
A0A3Q7I1F3	Solyc07g008950.3.1	Methionyl-tRNA synthetase OS=Solanum lycopersicum OX=4081 PE=3 SV=1	2.45386	0.0319309	-3.69364	2.16787	RR
A0A3Q7JDY1	Solyc12g096650.2.1	Uncharacterized protein OS=Solanum lycopersicum OX=4081 GN=101250100 PE=4 SV=1	2.44676	0.0323365	-3.69909	2.0813	RR
A0A3Q7EUE8	Solyc01g111060.3.1	PNP_UDP_1 domain-containing protein OS=Solanum lycopersicum OX=4081 PE=4 SV=1	2.44611	0.0323736	-3.69958	1.62293	RR
A0A3Q7JLM2	Solyc11g039840.2.1	Cytochrome b-c1 complex subunit Rieske, mitochondrial OS=Solanum lycopersicum OX=4081 PE=3 SV=1	-2.44425	0.0324812	-3.70101	-1.6432	MG
A0A3Q7F3P7	Solyc02g077670.3.1	J domain-containing protein OS=Solanum lycopersicum OX=4081 GN=101262478 PE=4 SV=1	2.43278	0.0331493	-3.70981	1.82743	RR
A0A3Q7ERU3	Solyc01g107130.3.1	EGF-like domain-containing protein OS=Solanum lycopersicum OX=4081 PE=3 SV=1	2.42461	0.0336339	-3.71608	1.16153	RR
A0A3Q7F740	Solyc02g084600.3.1.1	LRRNT_2 domain-containing protein OS=Solanum lycopersicum OX=4081 PE=3 SV=1	2.42093	0.0338539	-3.7189	1.72237	RR
A0A3Q7FTM6	Solyc02g082840.3.1	GRIP domain-containing protein OS=Solanum lycopersicum OX=4081 PE=4 SV=1	2.41592	0.0341564	-3.72275	2.63947	RR
P54153	Solyc03g111720.3.1	Peptide methionine sulfoxide reductase (Fragment) OS=Solanum lycopersicum OX=4081 GN=E4 PE=3 SV=1	2.40969	0.0345361	-3.72753	3.68663	RR
A0A3Q7HGG5	Solyc07g066430.3.1	Obg-like ATPase 1 OS=Solanum lycopersicum OX=4081 GN=101259460 PE=3 SV=1	-2.40517	0.0348139	-3.731	-1.41097	MG
A0A3Q7HJX2	Solyc06g009110.3.1	Peptidase A1 domain-containing protein OS=Solanum lycopersicum OX=4081 PE=3 SV=1	2.40257	0.0349746	-3.733	2.38023	RR
A0A3Q7I8W0	Solyc09g097970.3.1	Aldo_ket_red domain-containing protein OS=Solanum lycopersicum OX=4081 GN=104649444 PE=4 SV=1	-2.40052	0.0351016	-3.73457	-2.59363	MG
A0A3Q7FS03	Solyc03g117630.1.1.1	Uncharacterized protein OS=Solanum lycopersicum OX=4081 GN=101255185 PE=3 SV=1	2.3959	0.0353904	-3.73812	3.3249	RR
P93212	Solyc04g074230.2.1	14-3-3 protein 7 OS=Solanum lycopersicum OX=4081 GN=TFT7 PE=2 SV=2	2.37639	0.0366351	-3.75311	4.04543	RR
A0A3Q7F9P0	Solyc01g102960.3.1.1	SHSP domain-containing protein OS=Solanum lycopersicum OX=4081 GN=101254946 PE=3 SV=1	2.37355	0.0368192	-3.75529	2.26217	RR
A0A3Q7GRM6	Solyc06g035970.3.1	Tubulin beta chain OS=Solanum lycopersicum OX=4081 GN=101265829 PE=3 SV=1	-2.36418	0.037435	-3.76249	-2.6597	MG
A0A3Q7F1D2	Solyc01g080220.3.1	DLH domain-containing protein OS=Solanum lycopersicum OX=4081 GN=101261451 PE=4 SV=1	2.36327	0.0374951	-3.76319	3.0126	RR
A0A3Q7G979	Solyc05g005560.3.1	Uncharacterized protein OS=Solanum lycopersicum OX=4081 PE=4 SV=1	-2.3631	0.0375065	-3.76332	-3.81617	MG
A0A3Q7FTM5	Solyc03g118020.3.1	Uncharacterized protein OS=Solanum lycopersicum OX=4081 PE=4 SV=1	2.35869	0.0378006	-3.76671	2.09137	RR
A0A3Q7F5F8	Solyc01g094790.3.1	Cysteine synthase OS=Solanum lycopersicum OX=4081 GN=101255033 PE=3 SV=1	-2.3554	0.0380208	-3.76924	-1.13617	MG
A0A3Q7IKX3	Solyc10g080710.2.1	Asparagine--tRNA ligase OS=Solanum lycopersicum OX=4081 PE=3 SV=1	2.3473	0.0385691	-3.77546	2.68627	RR
A0A3Q7ISH1	Solyc11g012870.2.1	Uncharacterized protein OS=Solanum lycopersicum OX=4081 GN=101245017 PE=4 SV=1	2.33208	0.0396201	-3.78717	3.12857	RR
A0A3Q7IXY6	Solyc11g062190.2.1	ADP/ATP translocase OS=Solanum lycopersicum OX=4081 PE=3 SV=1	2.32424	0.0401722	-3.79319	3.38233	RR
A0A3Q7HGQ5	Solyc07g056490.3.1	Uncharacterized protein OS=Solanum lycopersicum OX=4081 PE=4 SV=1	2.32072	0.0404226	-3.7959	2.06713	RR
A0A3Q7GSA0	Solyc06g048540.3.1	ABC transporter domain-containing protein OS=Solanum lycopersicum OX=4081 GN=101247531 PE=4 SV=1	2.31832	0.0405943	-3.79775	1.06713	RR
A0A3Q7E908	Solyc01g008710.3.1	Mannan endo-1,4-beta-mannosidase OS=Solanum lycopersicum OX=4081 PE=3 SV=1	2.3084	0.0413105	-3.80538	4.1886	RR
A0A3Q7FAA3	Solyc01g103800.3.1	40S ribosomal protein S12 OS=Solanum lycopersicum OX=4081 GN=101247070 PE=3 SV=1	-2.3015	0.0418165	-3.81069	-2.86097	MG
A0A3Q7E8A8	Solyc01g006900.3.1	ML domain-containing protein OS=Solanum lycopersicum OX=4081 GN=101249001 PE=4 SV=1	2.28782	0.0428363	-3.82121	1.3254	RR
A0A3Q7IMW3	Solyc10g086125.1.1	Ubiquitin-like domain-containing protein OS=Solanum lycopersicum OX=4081 PE=4 SV=1	2.28755	0.0428564	-3.82141	2.05647	RR
A0A3Q7HZQ6	Solyc09g010330.3.1	Nascent polypeptide-associated complex subunit beta OS=Solanum lycopersicum OX=4081 GN=101268021 PE=3 SV=1	-2.26836	0.044328	-3.83617	-2.3848	MG
A0A3Q7EHH5	Solyc01g079450.3.1	Peptidase_S9 domain-containing protein OS=Solanum lycopersicum OX=4081 PE=4 SV=1	2.24743	0.0459883	-3.85226	1.38653	RR
A0A3Q7HJC7	Solyc08g005760.2.1	Uncharacterized protein OS=Solanum lycopersicum OX=4081 PE=3 SV=1	2.24609	0.0460967	-3.85329	4.55013	RR
Q40131	Solyc07g043420.3.1	Steroid 16alpha-hydroxylase OS=Solanum lycopersicum OX=4081 GN=544002 PE=2 SV=1	-2.23052	0.0473738	-3.86526	-2.84917	MG
A0A3Q7FR32	Solyc03g113930.2.1.1	SHSP domain-containing protein OS=Solanum lycopersicum OX=4081 PE=3 SV=1	2.23017	0.0474025	-3.86553	2.4068	RR
A0A3Q7ILR9	Solyc10g080900.2.1	Uncharacterized protein OS=Solanum lycopersicum OX=4081 PE=4 SV=1	2.22373	0.0479405	-3.87047	6.23573	RR
A0A3Q7FQ46	Solyc03g097700.3.1	Uncharacterized protein OS=Solanum lycopersicum OX=4081 PE=3 SV=1	2.2204	0.0482212	-3.87303	2.2527	RR
A8WBX7	Solyc11g007020.2.1	Diphosphomevalonate decarboxylase OS=Solanum lycopersicum OX=4081 GN=MDC PE=2 SV=1	2.21544	0.0486425	-3.87685	2.1832	RR
A0A3Q7EMD8	Solyc01g097350.3.1	Uncharacterized protein OS=Solanum lycopersicum OX=4081 GN=101262051 PE=4 SV=1	2.21542	0.048644	-3.87686	1.6421	RR
A0A3Q7G5Y8	Solyc03g044155.1.1.1	fn3_6 domain-containing protein OS=Solanum lycopersicum OX=4081 PE=4 SV=1	-2.2098	0.049125	-3.88118	-3.19373	MG
A0A3Q7I3U9	Solyc09g059040.3.1	PKS_ER domain-containing protein OS=Solanum lycopersicum OX=4081 GN=101243822 PE=4 SV=1	2.20731	0.0493395	-3.88309	1.25733	RR

## Sheet: TableS6
Table S6. Differentially expressed proteins (DEPs) between mature green (MG) and red ripe (RR) in NIL080. The empirical Bayes analysis pipeline of Bioconductor limma package was used to obtain the DEPs by comparing RR - MG. A p-value < 0.05 and |log2 FoldChange| ≥ 1 were set to determine significantly increased abundant proteins in MG or RR stages.
Accession	Solyc	Description	t_statistic	P_Value	B(Bayes)	log2FoldChange	increased_abundance
A0A3Q7J5H8	Solyc10g005960.1.1.1	Uncharacterized protein OS=Solanum lycopersicum OX=4081 GN=101265484 PE=3 SV=1	3.67152	0.00365141	-4.54255	2.1101	RR
Q05540	Solyc02g082930.3.1	Acidic 27 kDa endochitinase OS=Solanum lycopersicum OX=4081 GN=CHI17 PE=1 SV=1	3.37744	0.00613081	-4.54726	4.83377	RR
A0A3Q7HMQ9	Solyc08g028690.3.1	Uncharacterized protein OS=Solanum lycopersicum OX=4081 PE=4 SV=1	3.28167	0.00726814	-4.54889	2.18957	RR
A0A3Q7FCH4	Solyc02g091680.3.1	Fn3_like domain-containing protein OS=Solanum lycopersicum OX=4081 PE=3 SV=1	-3.26586	0.00747563	-4.54916	-3.20447	MG
A0A3Q7IFP1	Solyc10g049890.2.1	D-3-phosphoglycerate dehydrogenase OS=Solanum lycopersicum OX=4081 PE=3 SV=1	-3.17333	0.00881659	-4.55079	-2.32577	MG
A0A3Q7IZT1	Solyc11g068460.2.1	Uncharacterized protein OS=Solanum lycopersicum OX=4081 GN=101260202 PE=4 SV=1	3.14215	0.00932141	-4.55134	2.73173	RR
A0A3Q7JDH2	Solyc12g095930.2.1	Serine hydroxymethyltransferase OS=Solanum lycopersicum OX=4081 GN=101267301 PE=3 SV=1	-3.12636	0.00958821	-4.55163	-1.9325	MG
A0A3Q7HZ02	Solyc09g013080.3.1	Acetyl-CoA carboxytransferase OS=Solanum lycopersicum OX=4081 GN=101256513 PE=3 SV=1	-3.10436	0.00997282	-4.55203	-3.12027	MG
A0A3Q7GKY7	Solyc05g026240.2.1	LRRNT_2 domain-containing protein OS=Solanum lycopersicum OX=4081 PE=4 SV=1	-3.04548	0.0110809	-4.5531	-1.82527	MG
A0A3Q7H040	Solyc06g074870.2.1	Uncharacterized protein OS=Solanum lycopersicum OX=4081 PE=4 SV=1	-2.98789	0.0122847	-4.55417	-2.1931	MG
A0A3Q7IKB1	Solyc10g080080.2.1	Thioredoxin reductase OS=Solanum lycopersicum OX=4081 PE=3 SV=1	-2.94887	0.0131742	-4.55491	-2.02517	MG
A0A3Q7IH89	Solyc10g050890.2.1	Uncharacterized protein OS=Solanum lycopersicum OX=4081 GN=778326 PE=3 SV=1	-2.94434	0.0132816	-4.55499	-1.78377	MG
A0A3Q7E9K7	Solyc01g007910.3.1	Succinate--CoA ligase [ADP-forming] subunit alpha, mitochondrial OS=Solanum lycopersicum OX=4081 GN=543860 PE=3 SV=1	-2.94041	0.0133755	-4.55507	-1.99423	MG
A0A3Q7ES82	Solyc01g107810.3.1	Uncharacterized protein OS=Solanum lycopersicum OX=4081 PE=3 SV=1	2.91141	0.0140893	-4.55562	2.74387	RR
A0A3Q7JPX8	Solyc11g070120.2.1	Uncharacterized protein OS=Solanum lycopersicum OX=4081 GN=101248169 PE=4 SV=1	-2.90823	0.0141697	-4.55568	-2.04223	MG
A0A3Q7G8G0	Solyc03g065340.3.1	Alpha-1,4 glucan phosphorylase OS=Solanum lycopersicum OX=4081 GN=101252851 PE=3 SV=1	-2.83338	0.0162045	-4.55712	-1.73307	MG
A0A3Q7IN91	Solyc10g086190.2.1	Adenosine kinase OS=Solanum lycopersicum OX=4081 PE=3 SV=1	-2.82978	0.0163093	-4.55719	-1.77203	MG
A0A3Q7F385	Solyc02g072105.1.1	Dihydroorotase OS=Solanum lycopersicum OX=4081 PE=3 SV=1	-2.7971	0.0172933	-4.55783	-2.32827	MG
A0A3Q7FXN1	Solyc03g122120.3.1	Beta-ketoacyl-[acyl-carrier-protein] synthase I OS=Solanum lycopersicum OX=4081 PE=3 SV=1	-2.79648	0.0173125	-4.55784	-1.41087	MG
A0A3Q7FTT4	Solyc03g117040.3.1	Uncharacterized protein OS=Solanum lycopersicum OX=4081 PE=4 SV=1	-2.79064	0.0174947	-4.55796	-1.94507	MG
A0A3Q7GTD8	Solyc06g051810.3.1	Uncharacterized protein OS=Solanum lycopersicum OX=4081 GN=101256002 PE=4 SV=1	-2.6648	0.0219171	-4.56047	-1.4093	MG
A0A3Q7GST1	Solyc04g016470.3.1	Uncharacterized protein OS=Solanum lycopersicum OX=4081 PE=3 SV=1	2.6264	0.0234756	-4.56124	4.82833	RR
A0A3Q7JDP0	Solyc12g096190.2.1	PALP domain-containing protein OS=Solanum lycopersicum OX=4081 GN=101261400 PE=3 SV=1	-2.61703	0.0238718	-4.56144	-1.62817	MG
A0A3Q7EUX7	Solyc01g109830.3.1	Dihydrofolate reductase OS=Solanum lycopersicum OX=4081 PE=3 SV=1	-2.60187	0.0245273	-4.56175	-2.66983	MG
Q2MI64	Solyc01g007590.2.1	50S ribosomal protein L14, chloroplastic OS=Solanum lycopersicum OX=4081 GN=rpl14 PE=3 SV=1	-2.54576	0.0271113	-4.5629	-2.95767	MG
Q4VUC5	Solyc02g079930.3.1	Phosphosulfolactate synthase-related protein OS=Solanum lycopersicum OX=4081 GN=PSR PE=2 SV=1	-2.54072	0.0273564	-4.563	-1.44363	MG
A0A3Q7GJJ9	Solyc05g018320.3.1	Uncharacterized protein OS=Solanum lycopersicum OX=4081 GN=101266219 PE=3 SV=1	2.53603	0.027586	-4.5631	2.5001	RR
A0A3Q7H918	Solyc05g013680.3.1	Uncharacterized protein OS=Solanum lycopersicum OX=4081 PE=3 SV=1	-2.52241	0.0282641	-4.56338	-1.23873	MG
A0A3Q7I791	Solyc09g090040.3.1	Germin-like protein OS=Solanum lycopersicum OX=4081 GN=109121167 PE=3 SV=1	2.48593	0.0301609	-4.56414	1.0933	RR
A0A3Q7JFE9	Solyc12g099110.2.1	Uncharacterized protein OS=Solanum lycopersicum OX=4081 GN=101245144 PE=4 SV=1	-2.48326	0.0303046	-4.5642	-2.1782	MG
A0A3Q7HT77	Solyc08g080140.3.1	RmlD_sub_bind domain-containing protein OS=Solanum lycopersicum OX=4081 GN=101249670 PE=4 SV=1	-2.48319	0.0303082	-4.5642	-2.79277	MG
A0A3Q7FJL9	Solyc03g044660.3.1	4-hydroxy-tetrahydrodipicolinate synthase OS=Solanum lycopersicum OX=4081 GN=101250089 PE=3 SV=1	-2.38585	0.0360265	-4.56625	-1.40933	MG
A0A3Q7JGF7	Solyc10g084320.2.1.1	Uncharacterized protein OS=Solanum lycopersicum OX=4081 PE=3 SV=1	-2.38107	0.0363326	-4.56635	-2.19517	MG
A0A3Q7EHP2	Solyc01g080010.2.1.1	Peptidase A1 domain-containing protein OS=Solanum lycopersicum OX=4081 GN=543853 PE=4 SV=1	2.34349	0.03883	-4.56716	1.60183	RR
A0A3Q7GYZ2	Solyc06g065520.3.1	CCT-eta OS=Solanum lycopersicum OX=4081 GN=101247034 PE=3 SV=1	-2.337	0.0392773	-4.56729	-1.61837	MG
A0A3Q7IB19	Solyc10g005510.3.1	Uncharacterized protein OS=Solanum lycopersicum OX=4081 PE=3 SV=1	-2.3317	0.0396465	-4.56741	-1.36147	MG
A0A3Q7J176	Solyc11g073250.2.1	Histone H2A OS=Solanum lycopersicum OX=4081 PE=3 SV=1	2.33056	0.0397268	-4.56743	1.88347	RR
A0A3Q7G863	Solyc04g076790.3.1	Serine hydroxymethyltransferase OS=Solanum lycopersicum OX=4081 GN=101264818 PE=3 SV=1	-2.31638	0.0407331	-4.56774	-1.3473	MG
K4C627	Solyc06g053400.3.1	2-isopropylmalate synthase OS=Solanum lycopersicum OX=4081 GN=101245066 PE=2 SV=1	-2.31483	0.0408448	-4.56777	-2.394	MG
A0A3Q7FJD2	Solyc03g044330.1.1.1	Acetolactate synthase OS=Solanum lycopersicum OX=4081 GN=101247891 PE=3 SV=1	-2.30569	0.0415086	-4.56797	-1.80817	MG
A0A3Q7GJ89	Solyc03g119040.3.1	WD_REPEATS_REGION domain-containing protein OS=Solanum lycopersicum OX=4081 GN=543509 PE=4 SV=1	-2.30533	0.0415347	-4.56797	-1.49067	MG
A0A3Q7E957	Solyc01g008950.3.1	Uncharacterized protein OS=Solanum lycopersicum OX=4081 GN=101256315 PE=4 SV=1	2.29719	0.0421348	-4.56815	1.14277	RR
A0A3Q7H940	Solyc07g041900.3.1	Uncharacterized protein OS=Solanum lycopersicum OX=4081 PE=3 SV=1	2.28617	0.0429603	-4.56838	1.25317	RR
A0A3Q7IXH4	Solyc11g062270.2.1	Signal recognition particle subunit SRP72 OS=Solanum lycopersicum OX=4081 GN=101255954 PE=3 SV=1	-2.28182	0.0432909	-4.56848	-4.20033	MG
A0A3Q7FRB5	Solyc03g112075.1.1	D-3-phosphoglycerate dehydrogenase OS=Solanum lycopersicum OX=4081 GN=101246616 PE=3 SV=1	-2.27618	0.0437229	-4.5686	-1.10583	MG
A0A3Q7IMD9	Solyc10g083970.1.1.1	S-adenosylmethionine synthase OS=Solanum lycopersicum OX=4081 GN=101245012 PE=3 SV=1	-2.27181	0.0440601	-4.56869	-2.47183	MG
A0A3Q7EQY6	Solyc01g102660.3.1	Glutathione transferase OS=Solanum lycopersicum OX=4081 PE=3 SV=1	2.25131	0.0456764	-4.56914	1.93053	RR
A0A3Q7G9D1	Solyc05g005820.3.1	Glyceraldehyde-3-phosphate dehydrogenase OS=Solanum lycopersicum OX=4081 GN=101249641 PE=3 SV=1	-2.24493	0.0461905	-4.56927	-1.45263	MG
A0A3Q7FZG5	Solyc04g011400.3.1	UDP-glucuronate decarboxylase OS=Solanum lycopersicum OX=4081 GN=101263507 PE=3 SV=1	-2.24207	0.046423	-4.56934	-1.62167	MG
A0A3Q7H112	Solyc06g082090.3.1	Peptidase_M24 domain-containing protein OS=Solanum lycopersicum OX=4081 PE=3 SV=1	-2.23972	0.0466153	-4.56939	-1.57693	MG
A0A3Q7EI02	Solyc01g080410.3.1	Peptide-methionine (R)-S-oxide reductase OS=Solanum lycopersicum OX=4081 GN=101266452 PE=3 SV=1	2.23793	0.0467622	-4.56943	1.4393	RR
A0A3Q7FQ00	Solyc02g077040.3.1	Uncharacterized protein OS=Solanum lycopersicum OX=4081 PE=3 SV=1	2.23235	0.0472214	-4.56955	2.46873	RR
A0A3Q7ES85	Solyc01g008320.3.1	Uncharacterized protein OS=Solanum lycopersicum OX=4081 PE=4 SV=1	-2.22322	0.0479837	-4.56974	-1.25423	MG
A0A3Q7EU63	Solyc01g111510.3.1	PEROXIDASE_4 domain-containing protein OS=Solanum lycopersicum OX=4081 GN=101264261 PE=3 SV=1	-2.21477	0.0486988	-4.56993	-1.69897	MG
A0A3Q7IKG4	Solyc10g079300.2.1	Calcium-transporting ATPase OS=Solanum lycopersicum OX=4081 PE=3 SV=1	-2.21241	0.0489012	-4.56998	-1.9998	MG
A0A3Q7F4C1	Solyc01g091070.3.1	Methionine aminopeptidase OS=Solanum lycopersicum OX=4081 PE=3 SV=1	-2.21226	0.0489138	-4.56998	-1.73863	MG
A0A3Q7FNG4	Solyc03g098740.1.1.1	Uncharacterized protein OS=Solanum lycopersicum OX=4081 GN=101244562 PE=3 SV=1	2.20575	0.049474	-4.57012	3.6274	RR

## Sheet: TableS7
Table S7. Restriction enzymes, adapter sequences, pre-amplification primers and primer combinations for selective amplification used for cDNA-AFLP.
Restriction enzymes		ApoI	MseI
Adapter sequences	Top strand	CTCGTAGACTGCGTACC	AATTGGTACGCAGTCTAC
	Bottom strand	GACGATGAGTCCTGAG	TACTCAGGACTCAT
Pre-amplification		CTCGTAGACTGCGTACCAATT	GACGATGAGTCCTGAGTAA
primers (+0)*
Selective amplification		GACTGCGTACCAATTA (Apo12)	GATGAGTCCTGAGTAAG (Mse37)
primers (+1)**		GACTGCGTACCAATTC (Apo13)	GATGAGTCCTGAGTAAT (Mse38)
		GACTGCGTACCAATTT (Apo14)
Primer combinations		A: Mse37 - Apo12
		B: Mse37 - Apo13
		C: Mse37 - Apo14
		D: Mse38 - Apo12
* Primers sequences with no selective base at the end
** Primers sequences ended with one selective base
